# Supplementary material for: Multiscale modeling reveals aluminum nitride as an efficient propane dehydrogenation catalyst
Source: Royal Society of Chemistry journal article supplement (doi:10.1039/d2cy02173k), 2023-01-01
Supplement: d2cy02173k1.pdf [file d2cy02173k1.pdf]

## Supporting information

for

# Multiscale Modeling Reveals Aluminum Nitride as Efficient Propane Dehydrogenation Catalyst

Mona Abdelgaid,<sup>a</sup> Evan V. Miu,<sup>a</sup> Hyunguk Kwon,<sup>[a]</sup> Minttu M. Kauppinen,<sup>b</sup> Henrik Grönbeck,<sup>b</sup>  
and Giannis Mpourmpakis\*<sup>a</sup>

<sup>a</sup>Department of Chemical and Petroleum Engineering, University of Pittsburgh, Pittsburgh, PA  
15261, USA

<sup>b</sup>Department of Physics and Competence Centre for Catalysis, Chalmers University of  
Technology, 412 96 Göteborg, Sweden

\*Corresponding author: [gmpourmp@pitt.edu](mailto:gmpourmp@pitt.edu)

## Table of Contents

|                                                                                                             |    |
|-------------------------------------------------------------------------------------------------------------|----|
| 1. Microkinetic modeling.....                                                                               | 3  |
| 2. Ab initio molecular dynamics.....                                                                        | 5  |
| 2.1. Methods .....                                                                                          | 5  |
| 2.2. Discussion.....                                                                                        | 6  |
| 3. Electronic energy propane dehydrogenation reaction profiles.....                                         | 7  |
| 4. Propane dehydrogenation on metal nitrides vs metal oxides .....                                          | 9  |
| 5. The relaxed Cartesian coordinates of relevant transition state structures and their total energies ..... | 10 |
| 6. References .....                                                                                         | 59 |

# 1. Microkinetic modeling

Microkinetic modeling was performed using the fp\_chem software package available on the Mpourmpakis group Github.<sup>1</sup> A full reaction network was constructed which simultaneously considered all four propane dehydrogenation mechanisms investigated in this work (presented in Fig. 3 of the main manuscript). A total of seventeen elementary steps were included. Reaction networks for the AlN and Ga/AlN surfaces were identical, while only elementary reaction energies, barriers, and state vibrational frequencies differed. The total set of elementary steps is as follows:

1. Concerted C<sub>3</sub>H<sub>8</sub> Adsorption:  $C_3H_{8,(g)} + X + Y + N \leftrightarrow C_3H_8 - X - Y - N$
2. PS C<sub>3</sub>H<sub>8</sub> Adsorption:  $C_3H_{8,(g)} + X \leftrightarrow C_3H_{8,v} - X$
3. SP C<sub>3</sub>H<sub>8</sub> Adsorption:  $C_3H_{8,(g)} + X \leftrightarrow C_3H_{8,h} - X$
4. Concerted C<sub>3</sub>H<sub>6</sub> Formation:  $C_3H_8 - X - Y - N \leftrightarrow C_3H_6 - Y + H - X + H - N$
5. PS C<sub>3</sub>H<sub>7</sub> Formation:  $C_3H_{8,v} - X + N \leftrightarrow C_3H_{7,v} - X + H - N$
6. SP C<sub>3</sub>H<sub>7</sub> Formation:  $C_3H_{8,h} - X + N \leftrightarrow C_3H_{7,h} - X + H - N$
7. PSD C<sub>3</sub>H<sub>6</sub> Formation:  $C_3H_{7,v} - X + H - N + Y \leftrightarrow C_3H_{6,v} - X + H_2 - Y_a + N$
8. PSI C<sub>3</sub>H<sub>6</sub> Formation:  $C_3H_{7,v} - X + Y \leftrightarrow C_3H_{6,h} - X + H - Y$
9. SP C<sub>3</sub>H<sub>6</sub> Formation:  $C_3H_{7,h} - X + Y \leftrightarrow C_3H_{6,h} - X + H - Y$
10. PSD C<sub>3</sub>H<sub>6</sub> Desorption:  $C_3H_{6,v} - X \leftrightarrow C_3H_{6,(g)} + X$
11. PSI C<sub>3</sub>H<sub>6</sub> Desorption:  $C_3H_{6,h} - X \leftrightarrow C_3H_{6,(g)} + X$
12. Concerted C<sub>3</sub>H<sub>6</sub> Desorption:  $C_3H_6 - Y \leftrightarrow C_3H_{6,(g)} + Y$
13. Concerted H<sub>2</sub> Formation:  $H - X + H - N \leftrightarrow H_2 - X_b + N$
14. Concerted H<sub>2</sub> Desorption:  $H_2 - X_b \leftrightarrow H_{2,(g)} + X$

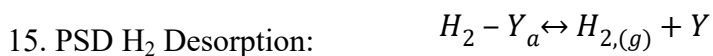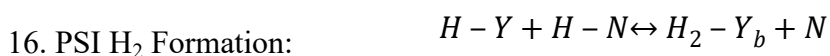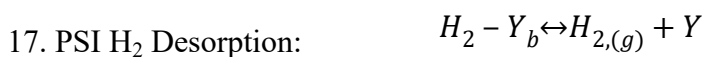

In the above steps, X and Y indicate either two different Al atoms or a Ga atom and an Al atom, respectively for the AlN and Ga/AlN surfaces. N is a nitrogen site. Each model considers three total surface sites that are involved in adsorption, surface reactions, and desorption. These are two metal sites (Al and Al for AlN or Ga and Al for Ga/AlN) and one nitrogen site. The subscripts *v* and *h* respectively denote vertical and horizontal adsorption configurations of alkanes, carbocations, and alkenes. These help to differentiate activation pathways which start with either the primary or secondary carbons of propane. The subscripts *a* and *b* identify H<sub>2</sub> adsorption states with or without a neighboring adsorbed alkene. We note many of these steps are shared between mechanisms, as shown by the reaction coordinate diagram in Fig. 3 of the main manuscript.

## 2. Ab initio molecular dynamics

### 2.1. Methods

Ab initio molecular dynamics (AIMD) and metadynamics simulations were performed using CP2K in the NVT ensemble at 873.15 K (typical dehydrogenation conditions)<sup>2</sup> using a velocity-scaling thermostat with a time constant of 100 fs. A time step of 0.5 fs was used for the integration of the equations of motion. To reduce the computational cost of AIMD and metadynamics simulations, the SCF and cutoff criteria were reduced to  $10^{-6}$  Hartree and 350 Ry, respectively (compared to the density function theory (DFT) reaction profile calculations). Additionally, a reduced Ga/AlN slab model with four layers was used where the bottom two layers were fixed at their optimized bulk position, whereas the top two layers were allowed to relax during the simulations. The system was first thermally equilibrated using the NVT ensemble for 2 ps, starting from a DFT-optimized structure. From the equilibrated structure, a metadynamics simulation was performed to accelerate sampling of the relevant configuration space with a history-dependent biasing potential along the collective variables (CVs). Two CVs were defined for metadynamics simulations of H<sub>2</sub> formation: (i) the sum of the distance between gallium and hydrogen and the distance between nitrogen and the other hydrogen ( $CV1 = d_{M-Ha} + d_{N-Hb}$ ) and (ii) the distance between two hydrogen atoms ( $CV2 = d_{Ha-Hb}$ ). The biasing potential has the form of Gaussian hills of 1.5 kcal/mol height and 0.05 Å width, which were applied at intervals of 50 time steps (25 fs). The free energy surface was constructed from the sum of the Gaussian potentials.<sup>3</sup> Quadratic walls were used to avoid the sampling of non-relevant parts of the configuration space by limiting the range of the CVs.

## 2.2. Discussion

We performed AIMD simulations to examine molecular  $H_2$  formation ( $H^+ + H^- \rightarrow H_2$ ) under dehydrogenation conditions at 873.15 K. Fig. S1 shows the free energy surface for molecular  $H_2$  formation from two hydrogen atoms adsorbed on the  $Ga_a-N_a$  site pair on the Ga/AlN surface. Note that the AIMD simulation was used to compute the minimum activation free energy for a forward reaction. Therefore, the simulation was stopped 2.5 ps after a first reaction event occurred, and the final state basin was not completely sampled. In the initial state (marked as (I) in Fig. S1), the two hydrogen atoms fluctuated while adsorbed on the surface, leading to a relatively larger variation of the hydrogen-hydrogen distance (CV2) than the sum of the hydrogen-metal and hydrogen-nitrogen distances (CV1). At around 20 ps, the two hydrogen atoms were combined on the Ga atom and desorbed from the surface as molecular  $H_2$  with a free energy barrier of 92 kJ mol<sup>-1</sup>, which is accessible at typical dehydrogenation temperatures. AIMD simulations, therefore, confirmed that the poisoning of the doped active site of Ga/AlN by hydrogen adsorption is unlikely under operating conditions.

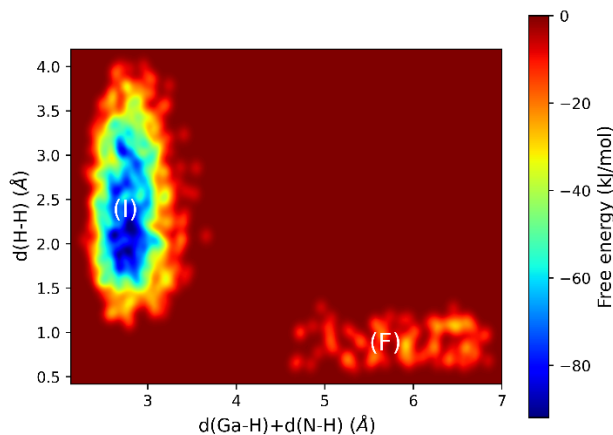

**Fig. S1** Free energy surface of metadynamics simulation for molecular  $H_2$  formation from two hydrogen atoms adsorbed on the  $Ga_a-N_a$  site pair on Ga/AlN. (I) and (F) indicate initial and final

states, respectively. The final state basin was not completely sampled since reaction events were confirmed.

### 3. Electronic energy propane dehydrogenation reaction profiles

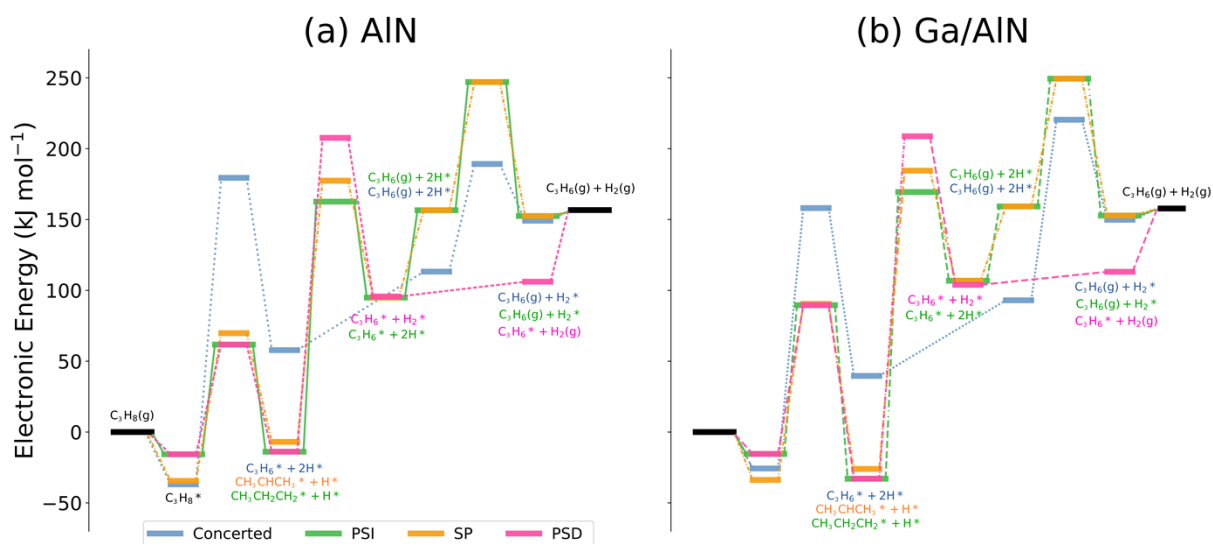

**Fig. S2** Electronic energy profiles on (a) undoped AlN and (b) Ga/AlN via the four PDH mechanisms shown in Fig. 3 following the same notation. Concerted, stepwise PSD, stepwise PSI, and stepwise SP mechanisms are depicted in light blue, pink, green, and orange, respectively. Adsorbed states are denoted with asterisks.

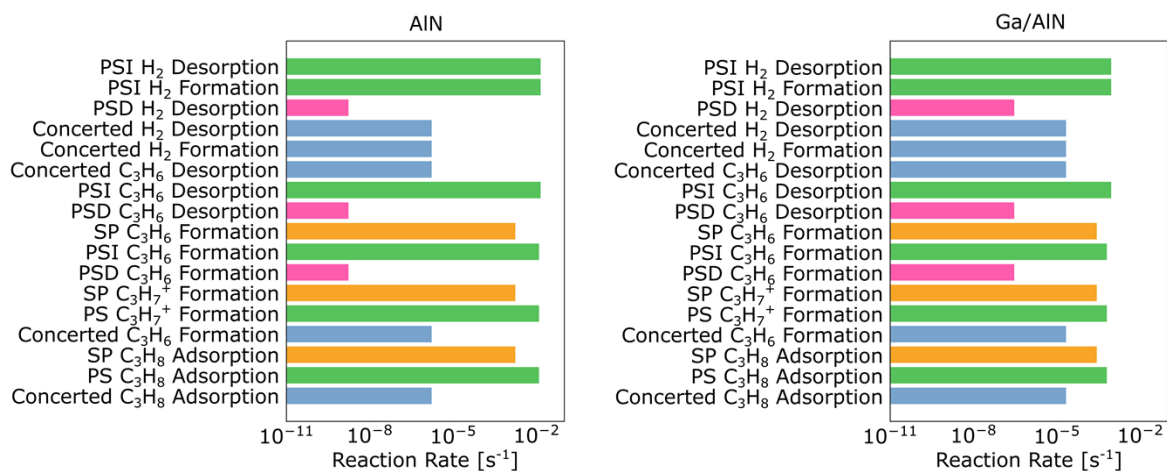

**Fig. S3.** Reaction rates for each elementary step in the PDH reaction network at 873.15 K on AlN and Ga/AlN. The green bars represent the PSI steps, the pink bars the PSD steps, the blue bars the concerted steps, and the orange bars the SP steps.



## 4. Propane dehydrogenation on metal nitrides vs metal oxides

**Table S1.** Comparison between the apparent turnover frequencies (TOFs) of the nitride catalysts and metal oxide catalysts reported in literature. Green, yellow, and red shading indicate catalyst with the highest, second highest, and lowest TOFs, respectively. References 4-7 are based on theoretical results, whereas reference 8 is based on experiments.

| Catalyst                                                   | Temperature [K] | Pressure [bar] | TOF: Catalyst [s <sup>-1</sup> ] | TOF: AlN [s <sup>-1</sup> ] | TOF: Ga/AlN [s <sup>-1</sup> ] |
|------------------------------------------------------------|-----------------|----------------|----------------------------------|-----------------------------|--------------------------------|
| $\beta$ -Ga <sub>2</sub> O <sub>3</sub> <sup>[4]</sup>     | 895.00          | 1.00           | 1.78x10 <sup>-5</sup>            | 2.47 x10 <sup>-2</sup>      | 1.72 x10 <sup>-3</sup>         |
| Pt/ $\beta$ -Ga <sub>2</sub> O <sub>3</sub> <sup>[4]</sup> | 895.00          | 1.00           | 5.04x10 <sup>-5</sup>            | 2.47 x10 <sup>-2</sup>      | 1.72 x10 <sup>-3</sup>         |
| Cr <sub>2</sub> O <sub>3</sub> <sup>[5]</sup>              | 850.00          | 0.35           | 6.28x10 <sup>-5</sup>            | 3.47 x10 <sup>-3</sup>      | 2.32 x10 <sup>-4</sup>         |
| V <sub>2</sub> O <sub>3</sub> <sup>[6]</sup>               | 850.00          | 0.35           | 7.03x10 <sup>-3</sup>            | 3.47 x10 <sup>-3</sup>      | 2.32 x10 <sup>-4</sup>         |
| ZnO <sup>[5]</sup>                                         | 850.00          | 0.35           | 2.52x10 <sup>-4</sup>            | 3.47 x10 <sup>-3</sup>      | 2.32 x10 <sup>-4</sup>         |
| TiO <sub>2</sub> <sup>[7]</sup>                            | 850.00          | 1.01           | ~ 5.5x10 <sup>-4</sup>           | 7.41 x10 <sup>-3</sup>      | 4.50 x10 <sup>-4</sup>         |
| V/TiO <sub>2</sub> <sup>[7]</sup>                          | 850.00          | 1.01           | 5.67x10 <sup>-3</sup>            | 7.41 x10 <sup>-3</sup>      | 4.50 x10 <sup>-4</sup>         |
| Al <sub>2</sub> O <sub>3</sub> <sup>[8]</sup>              | 873.15          | 1.01           | ~ 8.5x10 <sup>-2</sup>           | 1.40 x10 <sup>-2</sup>      | 9.20 x10 <sup>-4</sup>         |

## 5. The relaxed Cartesian coordinates of relevant transition state structures and their total energies

**Table S2.** transition state (TS) of C-H activation of propane on AlN through the concerted mechanism.

Total energy: -797.137 Hartree

|    |            |             |             |
|----|------------|-------------|-------------|
| Al | 1.77279148 | 1.96607564  | 6.71278482  |
| Al | 5.75695623 | 1.96562794  | 6.71376307  |
| N  | 3.76447788 | 1.96518975  | 6.71040935  |
| N  | 7.75125460 | 1.96683206  | 6.70829006  |
| Al | 3.76906638 | 3.89900517  | 6.72546978  |
| Al | 7.74652181 | 3.89894823  | 6.72081709  |
| N  | 1.77463456 | 3.90012862  | 6.71928851  |
| N  | 5.75501130 | 3.89893126  | 6.72798619  |
| Al | 1.77124618 | 7.79716468  | 6.70731407  |
| Al | 5.75754430 | 7.79620802  | 6.70749828  |
| N  | 3.76341208 | 7.79799002  | 6.70527967  |
| N  | 7.75135781 | 7.79821961  | 6.70302364  |
| N  | 1.77142713 | 9.73108654  | 6.72048191  |
| N  | 5.75754467 | 9.72973926  | 6.71999577  |
| Al | 3.76532147 | 9.73160121  | 6.71967723  |
| Al | 7.74959123 | 9.73182448  | 6.71937344  |
| Al | 1.77666862 | 4.89335876  | 8.36650012  |
| Al | 5.75411203 | 4.89740721  | 8.39562173  |
| N  | 7.74399306 | 4.88734390  | 8.37743835  |
| N  | 3.77215493 | 4.89051949  | 8.39791328  |
| N  | 1.77090313 | 6.82943897  | 8.37855246  |
| N  | 5.75775533 | 6.83084658  | 8.37524015  |
| Al | 7.74741777 | 6.82605768  | 8.36701577  |
| Al | 3.76760514 | 6.82553533  | 8.36935555  |
| Al | 1.77249870 | 10.74298819 | 8.36460850  |
| Al | 5.75698956 | 10.74050053 | 8.36825946  |
| N  | 3.76734355 | 10.73484014 | 8.37101369  |
| N  | 7.74815956 | 10.73763550 | 8.37023275  |
| N  | 1.77242832 | 1.01300237  | 8.39278908  |
| N  | 5.75822868 | 1.01724147  | 8.39742189  |
| Al | 3.76748967 | 1.00596508  | 8.38451681  |
| Al | 7.74921476 | 1.00848421  | 8.38304970  |
| Al | 1.77195229 | 7.84787365  | 10.04551720 |
| Al | 5.75536902 | 7.81943550  | 10.05330607 |
| N  | 3.76956838 | 7.82311595  | 10.02307361 |
| N  | 7.74255717 | 7.84321134  | 10.00850712 |
| N  | 1.77452756 | 9.77356648  | 10.02610529 |
| N  | 5.75439479 | 9.76310736  | 10.03616390 |
| Al | 3.76739783 | 9.76340842  | 10.06141718 |
| Al | 7.74740624 | 9.76783247  | 10.05635866 |

|    |            |             |             |
|----|------------|-------------|-------------|
| Al | 1.77386394 | 1.99804546  | 10.07828943 |
| Al | 5.75935808 | 2.00226494  | 10.09415861 |
| N  | 3.76771758 | 1.98804722  | 10.05864088 |
| N  | 7.75085612 | 2.00141958  | 10.05115663 |
| N  | 1.78829682 | 3.92954727  | 10.02186833 |
| N  | 5.74441543 | 3.94840920  | 10.10458554 |
| Al | 3.77191551 | 3.91693424  | 10.10040948 |
| Al | 7.75507820 | 3.93554156  | 10.06352719 |
| Al | 1.77107914 | 10.80647587 | 11.63705805 |
| Al | 5.75928461 | 10.80581814 | 11.63846036 |
| N  | 3.76344393 | 10.69732256 | 11.75252902 |
| N  | 7.75274019 | 10.70228347 | 11.74612582 |
| N  | 1.77178312 | 1.04589422  | 11.76161686 |
| N  | 5.75969379 | 1.03853600  | 11.76602913 |
| Al | 3.76628442 | 0.93329777  | 11.65553402 |
| Al | 7.75142632 | 0.94204732  | 11.65320155 |
| Al | 1.71341980 | 5.07000401  | 11.55571571 |
| Al | 5.88327052 | 4.93226196  | 11.77764279 |
| N  | 3.63619177 | 4.90477323  | 11.81431306 |
| N  | 7.82323049 | 4.94625766  | 11.68748813 |
| N  | 1.77018224 | 6.96298565  | 11.73539152 |
| N  | 5.75064700 | 6.86344162  | 11.74310632 |
| Al | 3.76995180 | 6.83563235  | 11.65998826 |
| Al | 7.74824317 | 6.83436669  | 11.61962050 |
| Al | 1.77195765 | 1.94403754  | 0.00000000  |
| Al | 1.77195765 | 7.77595756  | 0.00000000  |
| Al | 3.76418364 | 3.88730355  | 0.00000000  |
| Al | 5.75641122 | 1.94383752  | 0.00000000  |
| Al | 5.75641122 | 7.77575753  | 0.00000000  |
| Al | 7.75032740 | 3.88718396  | 0.00000000  |
| N  | 1.77213757 | 3.88747394  | 0.00000000  |
| N  | 3.76478373 | 1.94379783  | 0.00000000  |
| N  | 3.76478373 | 7.77570726  | 0.00000000  |
| N  | 5.75646149 | 3.88735382  | 0.00000000  |
| N  | 7.75006757 | 1.94370787  | 0.00000000  |
| N  | 7.75006757 | 7.77562735  | 0.00000000  |
| N  | 1.77213757 | 9.71938496  | 0.00031010  |
| N  | 5.75646149 | 9.71926484  | 0.00031010  |
| Al | 3.76418364 | 9.71921510  | 0.00031010  |
| Al | 7.75032740 | 9.71910503  | 0.00031010  |
| Al | 1.77195765 | 4.85982187  | 1.68307761  |
| Al | 5.75641122 | 4.85962184  | 1.68307761  |
| N  | 7.75006757 | 4.85949166  | 1.68308767  |
| N  | 3.76478373 | 4.85958162  | 1.68308767  |
| N  | 1.77213757 | 6.80325932  | 1.68315752  |
| N  | 5.75646149 | 6.80313920  | 1.68315752  |

|    |            |             |             |
|----|------------|-------------|-------------|
| Al | 7.75032740 | 6.80297939  | 1.68315752  |
| Al | 3.76419370 | 6.80308946  | 1.68315752  |
| Al | 1.77195765 | 10.69131325 | 1.68317763  |
| Al | 5.75641122 | 10.69111322 | 1.68317763  |
| N  | 3.76478373 | 10.69107300 | 1.68317763  |
| N  | 7.75006757 | 10.69098304 | 1.68317763  |
| N  | 1.77213757 | 0.97153828  | 1.68324801  |
| N  | 5.75646149 | 0.97141816  | 1.68324801  |
| Al | 3.76419370 | 0.97136788  | 1.68325753  |
| Al | 7.75032740 | 0.97125782  | 1.68325753  |
| Al | 1.77195765 | 7.77517755  | 3.36602399  |
| Al | 5.75641122 | 7.77497752  | 3.36602399  |
| N  | 3.76478373 | 7.77493731  | 3.36602399  |
| N  | 7.75006757 | 7.77484735  | 3.36602399  |
| N  | 1.77213757 | 9.71861501  | 3.36610442  |
| N  | 5.75646149 | 9.71849489  | 3.36610442  |
| Al | 3.76418364 | 9.71844514  | 3.36610442  |
| Al | 7.75032740 | 9.71832502  | 3.36610442  |
| Al | 1.77195765 | 1.94389784  | 3.36636372  |
| Al | 5.75641122 | 1.94369781  | 3.36636372  |
| N  | 3.76478373 | 1.94365760  | 3.36637430  |
| N  | 7.75006757 | 1.94356764  | 3.36637430  |
| N  | 1.77213757 | 3.88732366  | 3.36644415  |
| N  | 5.75646149 | 3.88720354  | 3.36644415  |
| Al | 3.76418364 | 3.88715379  | 3.36645368  |
| Al | 7.75032740 | 3.88704372  | 3.36645368  |
| Al | 1.77195765 | 10.69096293 | 5.04921167  |
| Al | 5.75641122 | 10.69076290 | 5.04922172  |
| N  | 7.75006757 | 10.69064331 | 5.04922172  |
| N  | 3.76478373 | 10.69072321 | 5.04922172  |
| N  | 1.77213757 | 0.97119802  | 5.04929157  |
| N  | 5.75646149 | 0.97107790  | 5.04930163  |
| Al | 7.75032740 | 0.97091808  | 5.04930163  |
| Al | 3.76419370 | 0.97102815  | 5.04930163  |
| Al | 1.77195765 | 4.85925194  | 5.04931168  |
| Al | 5.75641122 | 4.85905191  | 5.04931168  |
| N  | 3.76478373 | 4.85901170  | 5.04932174  |
| N  | 7.75006757 | 4.85892174  | 5.04932174  |
| N  | 1.77213757 | 6.80267935  | 5.04939159  |
| N  | 5.75646149 | 6.80255922  | 5.04939159  |
| Al | 3.76419370 | 6.80251953  | 5.04940164  |
| Al | 7.75032740 | 6.80239941  | 5.04940164  |
| C  | 5.07357917 | 4.34189917  | 14.62536881 |
| C  | 3.72494030 | 4.74561170  | 14.60035950 |
| C  | 3.35439623 | 6.19611131  | 14.80673162 |
| H  | 5.63823085 | 4.20845930  | 13.32147360 |

|   |            |            |             |
|---|------------|------------|-------------|
| H | 3.65137498 | 4.68204774 | 12.94543330 |
| H | 5.83205154 | 5.05614692 | 14.96653301 |
| H | 5.31598984 | 3.31136462 | 14.89743115 |
| H | 2.95711615 | 3.99340225 | 14.79847388 |
| H | 4.00360199 | 6.86974196 | 14.20447064 |
| H | 3.47995698 | 6.54552028 | 15.84694505 |
| H | 2.31800358 | 6.41408714 | 14.51336095 |

**Table S3.** TS of H<sub>2</sub> production on AlN through the concerted mechanism.

Total energy: -776.518 Hartree

|    |              |               |               |
|----|--------------|---------------|---------------|
| Al | 1.7717867184 | 1.9455190189  | 6.7169032186  |
| Al | 5.7563445026 | 1.9448173008  | 6.7173127648  |
| N  | 3.7637835227 | 1.9468985361  | 6.7170786523  |
| N  | 7.7504781304 | 1.9472501994  | 6.7160211785  |
| Al | 3.7669917014 | 3.8792473212  | 6.7163291569  |
| Al | 7.7469799613 | 3.8793465742  | 6.7131720076  |
| N  | 1.7722831030 | 3.8789543957  | 6.7101756854  |
| N  | 5.7558455118 | 3.8771198438  | 6.7189749898  |
| Al | 1.7712779297 | 7.7763907121  | 6.7171168446  |
| Al | 5.7571235960 | 7.7756001612  | 6.7174909164  |
| N  | 3.7638355012 | 7.7776518949  | 6.7176215641  |
| N  | 7.7506425972 | 7.7779290454  | 6.7159691629  |
| N  | 1.7713762745 | 9.7086798527  | 6.7125947543  |
| N  | 5.7571643740 | 9.7079581499  | 6.7127034916  |
| Al | 3.7649409890 | 9.7105581755  | 6.7144302512  |
| Al | 7.7494832324 | 9.7105695410  | 6.7138916295  |
| Al | 1.7729125839 | 4.8559220451  | 8.3671976785  |
| Al | 5.7554344231 | 4.8589319009  | 8.3889680767  |
| N  | 7.7432676363 | 4.8534598407  | 8.3780954673  |
| N  | 3.7701823042 | 4.8534936491  | 8.3888956495  |
| N  | 1.7708308898 | 6.7919517099  | 8.3823211208  |
| N  | 5.7575143195 | 6.7927372052  | 8.3812768510  |
| Al | 7.7480417702 | 6.7888977940  | 8.3721643315  |
| Al | 3.7664984541 | 6.7878541294  | 8.3736387092  |
| Al | 1.7722534176 | 10.6919603861 | 8.3714561734  |
| Al | 5.7560919358 | 10.6903834615 | 8.3745452293  |
| N  | 3.7662188818 | 10.6857737920 | 8.3819799590  |
| N  | 7.7482015979 | 10.6867730619 | 8.3809128119  |
| N  | 1.7717556907 | 0.9603836924  | 8.3797114554  |
| N  | 5.7565572251 | 0.9647759595  | 8.3831956538  |
| Al | 3.7655382780 | 0.9585121299  | 8.3747459528  |
| Al | 7.7487327257 | 0.9575061716  | 8.3730312765  |
| Al | 1.7739094740 | 7.7788360431  | 10.0692662194 |
| Al | 5.7560749863 | 7.7576674968  | 10.0763543501 |
| N  | 3.7700459199 | 7.7597461581  | 10.0451864085 |
| N  | 7.7440605996 | 7.7738675122  | 10.0360507817 |

|    |              |               |               |
|----|--------------|---------------|---------------|
| N  | 1.7730766652 | 9.7072054393  | 10.0318128012 |
| N  | 5.7551746562 | 9.7007260212  | 10.0417248053 |
| Al | 3.7666730080 | 9.7007725190  | 10.0687005359 |
| Al | 7.7476458944 | 9.7046882742  | 10.0644253633 |
| Al | 1.7726943418 | 1.9394173676  | 10.0655018262 |
| Al | 5.7567172097 | 1.9407831081  | 10.0790106049 |
| N  | 3.7666005732 | 1.9373829167  | 10.0453745667 |
| N  | 7.7478916904 | 1.9359823704  | 10.0407086628 |
| N  | 1.7698782543 | 3.8654223079  | 10.0096947338 |
| N  | 5.7543499610 | 3.8825274891  | 10.0851446907 |
| Al | 3.7606793547 | 3.8755186137  | 10.0788010510 |
| Al | 7.7626233025 | 3.8687438425  | 10.0511332526 |
| Al | 1.7707831904 | 10.7491308515 | 11.6399989594 |
| Al | 5.7573220141 | 10.7512135027 | 11.6426313757 |
| N  | 3.7632319349 | 10.6433739075 | 11.7553476942 |
| N  | 7.7510335446 | 10.6447453342 | 11.7514190845 |
| N  | 1.7708760760 | 0.9889012226  | 11.7497518353 |
| N  | 5.7574986524 | 0.9871164641  | 11.7576175277 |
| Al | 3.7628072072 | 0.8794492876  | 11.6409440160 |
| Al | 7.7509648017 | 0.8834977671  | 11.6416337857 |
| Al | 1.7444109445 | 4.9516290842  | 11.5986673530 |
| Al | 5.8827095208 | 4.8895864273  | 11.7082293043 |
| N  | 3.6617512220 | 4.8161638185  | 11.7614779307 |
| N  | 7.8061422463 | 4.8418656872  | 11.7165224383 |
| N  | 1.7694654625 | 6.8602540327  | 11.7546553361 |
| N  | 5.7569869167 | 6.7843058431  | 11.7670496915 |
| Al | 3.7630679683 | 6.7106202167  | 11.6454051674 |
| Al | 7.7672181603 | 6.7446801885  | 11.6401223829 |
| Al | 1.7719600000 | 1.9440400000  | 0.0000000000  |
| Al | 1.7719600000 | 7.7759700000  | 0.0000000000  |
| Al | 3.7641900000 | 3.8873100000  | 0.0000000000  |
| Al | 5.7564200000 | 1.9438400000  | 0.0000000000  |
| Al | 5.7564200000 | 7.7757700000  | 0.0000000000  |
| Al | 7.7503400000 | 3.8871900000  | 0.0000000000  |
| N  | 1.7721400000 | 3.8874800000  | 0.0000000000  |
| N  | 3.7647900000 | 1.9438000000  | 0.0000000000  |
| N  | 3.7647900000 | 7.7757200000  | 0.0000000000  |
| N  | 5.7564700000 | 3.8873600000  | 0.0000000000  |
| N  | 7.7500800000 | 1.9437100000  | 0.0000000000  |
| N  | 7.7500800000 | 7.7756400000  | 0.0000000000  |
| N  | 1.7721400000 | 9.7194000000  | 0.0003100000  |
| N  | 5.7564700000 | 9.7192800000  | 0.0003100000  |
| Al | 3.7641900000 | 9.7192300000  | 0.0003100000  |
| Al | 7.7503400000 | 9.7191200000  | 0.0003100000  |
| Al | 1.7719600000 | 4.8598300000  | 1.6830800000  |
| Al | 5.7564200000 | 4.8596300000  | 1.6830800000  |

|    |              |               |              |
|----|--------------|---------------|--------------|
| N  | 7.7500800000 | 4.8595000000  | 1.6830900000 |
| N  | 3.7647900000 | 4.8595900000  | 1.6830900000 |
| N  | 1.7721400000 | 6.8032700000  | 1.6831600000 |
| N  | 5.7564700000 | 6.8031500000  | 1.6831600000 |
| Al | 7.7503400000 | 6.8029900000  | 1.6831600000 |
| Al | 3.7642000000 | 6.8031000000  | 1.6831600000 |
| Al | 1.7719600000 | 10.6913300000 | 1.6831800000 |
| Al | 5.7564200000 | 10.6911300000 | 1.6831800000 |
| N  | 3.7647900000 | 10.6910900000 | 1.6831800000 |
| N  | 7.7500800000 | 10.6910000000 | 1.6831800000 |
| N  | 1.7721400000 | 0.9715400000  | 1.6832500000 |
| N  | 5.7564700000 | 0.9714200000  | 1.6832500000 |
| Al | 3.7642000000 | 0.9713700000  | 1.6832600000 |
| Al | 7.7503400000 | 0.9712600000  | 1.6832600000 |
| Al | 1.7719600000 | 7.7751900000  | 3.3660300000 |
| Al | 5.7564200000 | 7.7749900000  | 3.3660300000 |
| N  | 3.7647900000 | 7.7749500000  | 3.3660300000 |
| N  | 7.7500800000 | 7.7748600000  | 3.3660300000 |
| N  | 1.7721400000 | 9.7186300000  | 3.3661100000 |
| N  | 5.7564700000 | 9.7185100000  | 3.3661100000 |
| Al | 3.7641900000 | 9.7184600000  | 3.3661100000 |
| Al | 7.7503400000 | 9.7183400000  | 3.3661100000 |
| Al | 1.7719600000 | 1.9439000000  | 3.3663700000 |
| Al | 5.7564200000 | 1.9437000000  | 3.3663700000 |
| N  | 3.7647900000 | 1.9436600000  | 3.3663800000 |
| N  | 7.7500800000 | 1.9435700000  | 3.3663800000 |
| N  | 1.7721400000 | 3.8873300000  | 3.3664500000 |
| N  | 5.7564700000 | 3.8872100000  | 3.3664500000 |
| Al | 3.7641900000 | 3.8871600000  | 3.3664600000 |
| Al | 7.7503400000 | 3.8870500000  | 3.3664600000 |
| Al | 1.7719600000 | 10.6909800000 | 5.0492200000 |
| Al | 5.7564200000 | 10.6907800000 | 5.0492300000 |
| N  | 7.7500800000 | 10.6906600000 | 5.0492300000 |
| N  | 3.7647900000 | 10.6907400000 | 5.0492300000 |
| N  | 1.7721400000 | 0.9712000000  | 5.0493000000 |
| N  | 5.7564700000 | 0.9710800000  | 5.0493100000 |
| Al | 7.7503400000 | 0.9709200000  | 5.0493100000 |
| Al | 3.7642000000 | 0.9710300000  | 5.0493100000 |
| Al | 1.7719600000 | 4.8592600000  | 5.0493200000 |
| Al | 5.7564200000 | 4.8590600000  | 5.0493200000 |
| N  | 3.7647900000 | 4.8590200000  | 5.0493300000 |
| N  | 7.7500800000 | 4.8589300000  | 5.0493300000 |
| N  | 1.7721400000 | 6.8026900000  | 5.0494000000 |
| N  | 5.7564700000 | 6.8025700000  | 5.0494000000 |
| Al | 3.7642000000 | 6.8025300000  | 5.0494100000 |
| Al | 7.7503400000 | 6.8024100000  | 5.0494100000 |

|   |              |              |               |
|---|--------------|--------------|---------------|
| H | 4.5995559234 | 4.2488422604 | 12.8225246000 |
| H | 5.4030821236 | 4.0200970694 | 13.2308970660 |

**Table S4.** TS of first C-H activation on AlN through the stepwise PS mechanism.

Total energy: -797.182 Hartree

|    |            |             |             |
|----|------------|-------------|-------------|
| Al | 1.76931830 | 1.95513877  | 6.71662797  |
| Al | 5.75413890 | 1.95421813  | 6.71745757  |
| N  | 3.76117857 | 1.95433466  | 6.71465462  |
| N  | 7.74834630 | 1.95476002  | 6.71420700  |
| Al | 3.76608935 | 3.88872558  | 6.72198995  |
| Al | 7.74277769 | 3.88885610  | 6.71891180  |
| N  | 1.76990357 | 3.89028577  | 6.71573541  |
| N  | 5.75304002 | 3.88768470  | 6.72597573  |
| Al | 1.76889084 | 7.78510687  | 6.71522375  |
| Al | 5.75486200 | 7.78417826  | 6.71586162  |
| N  | 3.76108798 | 7.78568978  | 6.71362905  |
| N  | 7.74866783 | 7.78604705  | 6.71230859  |
| N  | 1.76920195 | 9.72032416  | 6.71843650  |
| N  | 5.75503933 | 9.71916527  | 6.71820192  |
| Al | 3.76307786 | 9.72073354  | 6.71894508  |
| Al | 7.74709467 | 9.72080511  | 6.71860714  |
| Al | 1.76720298 | 4.87029442  | 8.37071995  |
| Al | 5.75110759 | 4.87514029  | 8.40245618  |
| N  | 7.73435212 | 4.86773745  | 8.38265440  |
| N  | 3.76868806 | 4.86730342  | 8.39456299  |
| N  | 1.76616146 | 6.80837731  | 8.38556805  |
| N  | 5.75271166 | 6.81056264  | 8.38394433  |
| Al | 7.74211238 | 6.80475424  | 8.37366337  |
| Al | 3.76314924 | 6.80369180  | 8.37481294  |
| Al | 1.76821132 | 10.71644994 | 8.37175405  |
| Al | 5.75238752 | 10.71418713 | 8.37589742  |
| N  | 3.76317724 | 10.70873604 | 8.38118095  |
| N  | 7.74338705 | 10.70969445 | 8.38047321  |
| N  | 1.76749912 | 0.98609130  | 8.38914084  |
| N  | 5.75247100 | 0.99198340  | 8.39450052  |
| Al | 3.76219467 | 0.98270191  | 8.38275717  |
| Al | 7.74383138 | 0.98171480  | 8.38200182  |
| Al | 1.76685770 | 7.81108169  | 10.06389394 |
| Al | 5.75032079 | 7.78226700  | 10.07402132 |
| N  | 3.76543998 | 7.78935754  | 10.03686727 |
| N  | 7.73577038 | 7.80256117  | 10.02892411 |
| N  | 1.76762598 | 9.73717524  | 10.03169649 |
| N  | 5.74988428 | 9.72720418  | 10.04345254 |
| Al | 3.76209561 | 9.72679291  | 10.06720596 |
| Al | 7.74141651 | 9.73073870  | 10.06413242 |
| Al | 1.76593692 | 1.96796326  | 10.07469151 |



|    |            |             |             |
|----|------------|-------------|-------------|
| Al | 5.75106839 | 1.97079320  | 10.09385546 |
| N  | 3.76136595 | 1.96414329  | 10.05604559 |
| N  | 7.74077220 | 1.96134132  | 10.05359438 |
| N  | 1.75975009 | 3.89068703  | 10.01353550 |
| N  | 5.74814037 | 3.91597742  | 10.12222901 |
| Al | 3.75426535 | 3.90577417  | 10.09030897 |
| Al | 7.75436804 | 3.89954447  | 10.06640184 |
| Al | 1.76518056 | 10.76663126 | 11.64391160 |
| Al | 5.75117904 | 10.76830657 | 11.64626513 |
| N  | 3.75674589 | 10.66094686 | 11.75928579 |
| N  | 7.74596095 | 10.66178126 | 11.75788508 |
| N  | 1.76520219 | 1.00671399  | 11.75691290 |
| N  | 5.75111541 | 1.00077258  | 11.76446162 |
| Al | 3.75468368 | 0.89533331  | 11.64187865 |
| Al | 7.74617356 | 0.89858245  | 11.64551515 |
| Al | 1.72886012 | 5.00739518  | 11.58729950 |
| Al | 5.89640575 | 4.91428517  | 11.77279292 |
| N  | 3.61988458 | 4.86864584  | 11.74809150 |
| N  | 7.81479262 | 4.89090476  | 11.72111744 |
| N  | 1.75937009 | 6.91966319  | 11.75829792 |
| N  | 5.74856298 | 6.81765970  | 11.77217648 |
| Al | 3.75374188 | 6.75721861  | 11.64307179 |
| Al | 7.75973784 | 6.79138329  | 11.64043122 |
| Al | 1.77195924 | 1.94403913  | 0.00000000  |
| Al | 1.77195924 | 7.77596708  | 0.00000000  |
| Al | 3.76418840 | 3.88730831  | 0.00000000  |
| Al | 5.75641757 | 1.94383910  | 0.00000000  |
| Al | 5.75641757 | 7.77576706  | 0.00000000  |
| Al | 7.75033693 | 3.88718872  | 0.00000000  |
| N  | 1.77213916 | 3.88747871  | 0.00000000  |
| N  | 3.76478849 | 1.94379942  | 0.00000000  |
| N  | 3.76478849 | 7.77571678  | 0.00000000  |
| N  | 5.75646784 | 3.88735858  | 0.00000000  |
| N  | 7.75007710 | 1.94370946  | 0.00000000  |
| N  | 7.75007710 | 7.77563688  | 0.00000000  |
| N  | 1.77213916 | 9.71939608  | 0.00031010  |
| N  | 5.75646784 | 9.71927595  | 0.00031010  |
| Al | 3.76418840 | 9.71922621  | 0.00031010  |
| Al | 7.75033693 | 9.71911614  | 0.00031010  |
| Al | 1.77195924 | 4.85982822  | 1.68307920  |
| Al | 5.75641757 | 4.85962819  | 1.68307920  |
| N  | 7.75007710 | 4.85949801  | 1.68308925  |
| N  | 3.76478849 | 4.85958797  | 1.68308925  |
| N  | 1.77213916 | 6.80326726  | 1.68315910  |
| N  | 5.75646784 | 6.80314714  | 1.68315910  |
| Al | 7.75033693 | 6.80298733  | 1.68315910  |

|    |            |             |             |
|----|------------|-------------|-------------|
| Al | 3.76419846 | 6.80309740  | 1.68315910  |
| Al | 1.77195924 | 10.69132595 | 1.68317921  |
| Al | 5.75641757 | 10.69112592 | 1.68317921  |
| N  | 3.76478849 | 10.69108570 | 1.68317921  |
| N  | 7.75007710 | 10.69099574 | 1.68317921  |
| N  | 1.77213916 | 0.97153987  | 1.68324959  |
| N  | 5.75646784 | 0.97141974  | 1.68324959  |
| Al | 3.76419846 | 0.97136947  | 1.68325912  |
| Al | 7.75033693 | 0.97125940  | 1.68325912  |
| Al | 1.77195924 | 7.77518708  | 3.36602875  |
| Al | 5.75641757 | 7.77498705  | 3.36602875  |
| N  | 3.76478849 | 7.77494683  | 3.36602875  |
| N  | 7.75007710 | 7.77485687  | 3.36602875  |
| N  | 1.77213916 | 9.71862612  | 3.36610866  |
| N  | 5.75646784 | 9.71850600  | 3.36610866  |
| Al | 3.76418840 | 9.71845626  | 3.36610866  |
| Al | 7.75033693 | 9.71833613  | 3.36610866  |
| Al | 1.77195924 | 1.94389943  | 3.36636848  |
| Al | 5.75641757 | 1.94369940  | 3.36636848  |
| N  | 3.76478849 | 1.94365918  | 3.36637854  |
| N  | 7.75007710 | 1.94356922  | 3.36637854  |
| N  | 1.77213916 | 3.88732842  | 3.36644892  |
| N  | 5.75646784 | 3.88720830  | 3.36644892  |
| Al | 3.76418840 | 3.88715856  | 3.36645844  |
| Al | 7.75033693 | 3.88704849  | 3.36645844  |
| Al | 1.77195924 | 10.69097563 | 5.04921802  |
| Al | 5.75641757 | 10.69077560 | 5.04922807  |
| N  | 7.75007710 | 10.69065601 | 5.04922807  |
| N  | 3.76478849 | 10.69073591 | 5.04922807  |
| N  | 1.77213916 | 0.97119961  | 5.04929792  |
| N  | 5.75646784 | 0.97107948  | 5.04930798  |
| Al | 7.75033693 | 0.97091967  | 5.04930798  |
| Al | 3.76419846 | 0.97102974  | 5.04930798  |
| Al | 1.77195924 | 4.85925829  | 5.04931803  |
| Al | 5.75641757 | 4.85905826  | 5.04931803  |
| N  | 3.76478849 | 4.85901805  | 5.04932809  |
| N  | 7.75007710 | 4.85892809  | 5.04932809  |
| N  | 1.77213916 | 6.80268728  | 5.04939794  |
| N  | 5.75646784 | 6.80256716  | 5.04939794  |
| Al | 3.76419846 | 6.80252747  | 5.04940799  |
| Al | 7.75033693 | 6.80240735  | 5.04940799  |
| C  | 5.35374294 | 3.97734196  | 13.69334015 |
| C  | 4.67101119 | 4.65300695  | 14.89453067 |
| C  | 4.83469713 | 3.86304399  | 16.19579076 |
| H  | 4.46498934 | 4.37794415  | 12.74066270 |
| H  | 6.45085711 | 4.04483938  | 13.81202144 |

|   |            |            |             |
|---|------------|------------|-------------|
| H | 5.14580206 | 2.89637433 | 13.66217143 |
| H | 5.07268422 | 5.67158868 | 15.01710935 |
| H | 3.59509264 | 4.78129882 | 14.68347525 |
| H | 4.36168591 | 2.87298693 | 16.10958872 |
| H | 5.89707032 | 3.69975204 | 16.42968116 |
| H | 4.37524445 | 4.38050244 | 17.05100381 |

**Table S5.** TS of second C-H activation on AlN through the stepwise PSI mechanism.

Total energy: -797.143 Hartree

|    |            |             |             |
|----|------------|-------------|-------------|
| Al | 1.78428964 | 1.92525470  | 6.72212108  |
| Al | 5.76809690 | 1.92490609  | 6.72223368  |
| N  | 3.77452601 | 1.92511095  | 6.72612154  |
| N  | 7.76170044 | 1.92683146  | 6.72348780  |
| Al | 3.78237763 | 3.85963939  | 6.70489667  |
| Al | 7.75692162 | 3.85978670  | 6.70018982  |
| N  | 1.78478877 | 3.85934834  | 6.69394417  |
| N  | 5.76657062 | 3.85733719  | 6.70661268  |
| Al | 1.78973664 | 7.75525823  | 6.72719877  |
| Al | 5.76579959 | 7.75536495  | 6.72571323  |
| N  | 3.77542108 | 7.75541364  | 6.73435578  |
| N  | 7.76411295 | 7.75464523  | 6.72245835  |
| N  | 1.78265768 | 9.68980541  | 6.70457554  |
| N  | 5.76948730 | 9.68910367  | 6.70271371  |
| Al | 3.77761299 | 9.68761416  | 6.70929291  |
| Al | 7.76258120 | 9.68757550  | 6.70742686  |
| Al | 1.79853678 | 4.82558043  | 8.34650131  |
| Al | 5.77951767 | 4.83234627  | 8.38432363  |
| N  | 7.76042069 | 4.81945358  | 8.36889880  |
| N  | 3.80104230 | 4.81476925  | 8.38860287  |
| N  | 1.80738680 | 6.75484939  | 8.38437977  |
| N  | 5.77375109 | 6.76391346  | 8.37903764  |
| Al | 7.77499552 | 6.76345133  | 8.37263029  |
| Al | 3.79358172 | 6.75722489  | 8.40971159  |
| Al | 1.79850979 | 10.64236103 | 8.37983254  |
| Al | 5.77730739 | 10.64084106 | 8.38168596  |
| N  | 3.78958285 | 10.63326404 | 8.39168641  |
| N  | 7.76978070 | 10.64094321 | 8.38605057  |
| N  | 1.79376227 | 0.91291304  | 8.37004692  |
| N  | 5.77725746 | 0.92049814  | 8.37512040  |
| Al | 3.78861256 | 0.90174672  | 8.36370425  |
| Al | 7.77081934 | 0.90578384  | 8.36092587  |
| Al | 1.83044696 | 7.71586864  | 10.10017784 |
| Al | 5.78286767 | 7.69023852  | 10.09239399 |
| N  | 3.80703164 | 7.67593451  | 10.14013356 |
| N  | 7.79354496 | 7.73658650  | 10.01193067 |
| N  | 1.81508736 | 9.65624829  | 10.03888825 |

|    |            |             |             |
|----|------------|-------------|-------------|
| N  | 5.78437524 | 9.64527377  | 10.04520240 |
| Al | 3.80289270 | 9.62519755  | 10.08684307 |
| Al | 7.78396894 | 9.64185322  | 10.05929172 |
| Al | 1.80264759 | 1.87418344  | 10.05588756 |
| Al | 5.79079614 | 1.87678777  | 10.07619885 |
| N  | 3.79745036 | 1.85997444  | 10.04327538 |
| N  | 7.77863975 | 1.87202580  | 10.03298256 |
| N  | 1.81579972 | 3.79804957  | 9.95616744  |
| N  | 5.77389461 | 3.81862992  | 10.08073535 |
| Al | 3.79868403 | 3.77987424  | 10.02089575 |
| Al | 7.79144713 | 3.79861625  | 10.01236596 |
| Al | 1.80734709 | 10.68337792 | 11.64666628 |
| Al | 5.79811276 | 10.68436021 | 11.64782059 |
| N  | 3.80183705 | 10.57584503 | 11.77660158 |
| N  | 7.78823316 | 10.58315574 | 11.75613180 |
| N  | 1.80777113 | 0.93002783  | 11.74828680 |
| N  | 5.79379002 | 0.92798287  | 11.76090211 |
| Al | 3.79933112 | 0.80138332  | 11.63092925 |
| Al | 7.78989997 | 0.81803242  | 11.63136439 |
| Al | 1.74089432 | 4.93229641  | 11.49789290 |
| Al | 5.95163026 | 4.83682761  | 11.71229644 |
| N  | 3.65819041 | 4.72180046  | 11.72377661 |
| N  | 7.86935762 | 4.75440049  | 11.65055572 |
| N  | 1.77040979 | 6.79393414  | 11.75943426 |
| N  | 5.87685993 | 6.70777103  | 11.70936013 |
| Al | 3.83310332 | 6.71376373  | 11.93738760 |
| Al | 7.80684535 | 6.67943351  | 11.59358725 |
| Al | 1.77195964 | 1.94403958  | 0.00000000  |
| Al | 1.77195964 | 7.77596341  | 0.00000000  |
| Al | 3.76418923 | 3.88730919  | 0.00000000  |
| Al | 5.75641883 | 1.94383957  | 0.00000000  |
| Al | 5.75641883 | 7.77576340  | 0.00000000  |
| Al | 7.75033334 | 3.88718938  | 0.00000000  |
| N  | 1.77213960 | 3.88747938  | 0.00000000  |
| N  | 3.76478927 | 1.94379972  | 0.00000000  |
| N  | 3.76478927 | 7.77571326  | 0.00000000  |
| N  | 5.75646896 | 3.88735931  | 0.00000000  |
| N  | 7.75007342 | 1.94370974  | 0.00000000  |
| N  | 7.75007342 | 7.77563331  | 0.00000000  |
| N  | 1.77213960 | 9.71939293  | 0.00031005  |
| N  | 5.75646896 | 9.71927287  | 0.00031005  |
| Al | 3.76418923 | 9.71922300  | 0.00031005  |
| Al | 7.75033334 | 9.71911296  | 0.00031005  |
| Al | 1.77195964 | 4.85982914  | 1.68307962  |
| Al | 5.75641883 | 4.85962913  | 1.68307962  |
| N  | 7.75007342 | 4.85949904  | 1.68308964  |

|    |            |             |             |
|----|------------|-------------|-------------|
| N  | 3.76478927 | 4.85958902  | 1.68308964  |
| N  | 1.77213960 | 6.80326350  | 1.68315957  |
| N  | 5.75646896 | 6.80314344  | 1.68315957  |
| Al | 7.75033334 | 6.80298353  | 1.68315957  |
| Al | 3.76419925 | 6.80309357  | 1.68315957  |
| Al | 1.77195964 | 10.69132287 | 1.68317962  |
| Al | 5.75641883 | 10.69112285 | 1.68317962  |
| N  | 3.76478927 | 10.69108275 | 1.68317962  |
| N  | 7.75007342 | 10.69099276 | 1.68317962  |
| N  | 1.77213960 | 0.97153994  | 1.68324980  |
| N  | 5.75646896 | 0.97141987  | 1.68324980  |
| Al | 3.76419925 | 0.97136974  | 1.68325958  |
| Al | 7.75033334 | 0.97125971  | 1.68325958  |
| Al | 1.77195964 | 7.77518341  | 3.36602940  |
| Al | 5.75641883 | 7.77498340  | 3.36602940  |
| N  | 3.76478927 | 7.77494329  | 3.36602940  |
| N  | 7.75007342 | 7.77485331  | 3.36602940  |
| N  | 1.77213960 | 9.71862295  | 3.36610935  |
| N  | 5.75646896 | 9.71850289  | 3.36610935  |
| Al | 3.76418923 | 9.71845302  | 3.36610935  |
| Al | 7.75033334 | 9.71833296  | 3.36610935  |
| Al | 1.77195964 | 1.94389972  | 3.36636926  |
| Al | 5.75641883 | 1.94369971  | 3.36636926  |
| N  | 3.76478927 | 1.94365961  | 3.36637929  |
| N  | 7.75007342 | 1.94356963  | 3.36637929  |
| N  | 1.77213960 | 3.88732924  | 3.36644948  |
| N  | 5.75646896 | 3.88720918  | 3.36644948  |
| Al | 3.76418923 | 3.88715930  | 3.36645924  |
| Al | 7.75033334 | 3.88704927  | 3.36645924  |
| Al | 1.77195964 | 10.69097271 | 5.04921905  |
| Al | 5.75641883 | 10.69077270 | 5.04922907  |
| N  | 7.75007342 | 10.69065290 | 5.04922907  |
| N  | 3.76478927 | 10.69073285 | 5.04922907  |
| N  | 1.77213960 | 0.97119981  | 5.04929900  |
| N  | 5.75646896 | 0.97107974  | 5.04930903  |
| Al | 7.75033334 | 0.97091984  | 5.04930903  |
| Al | 3.76419925 | 0.97102987  | 5.04930903  |
| Al | 1.77195964 | 4.85925918  | 5.04931905  |
| Al | 5.75641883 | 4.85905916  | 5.04931905  |
| N  | 3.76478927 | 4.85901906  | 5.04932908  |
| N  | 7.75007342 | 4.85892908  | 5.04932908  |
| N  | 1.77213960 | 6.80268351  | 5.04939901  |
| N  | 5.75646896 | 6.80256345  | 5.04939901  |
| Al | 3.76419925 | 6.80252360  | 5.04940903  |
| Al | 7.75033334 | 6.80240354  | 5.04940903  |
| C  | 5.77832721 | 4.22357417  | 13.82524795 |

|   |            |            |             |
|---|------------|------------|-------------|
| C | 5.36350132 | 5.31589803 | 14.58866623 |
| C | 4.45665212 | 5.16812796 | 15.76586944 |
| H | 6.85288907 | 4.16812178 | 13.59057629 |
| H | 5.30861659 | 3.24865069 | 13.99923561 |
| H | 3.83886535 | 4.21607571 | 12.60013704 |
| H | 5.98556454 | 6.21382104 | 14.55383176 |
| H | 4.10421040 | 6.54383099 | 13.63668256 |
| H | 3.98952517 | 6.11183442 | 16.06465127 |
| H | 5.07457215 | 4.80270905 | 16.60829810 |
| H | 3.68172995 | 4.40979447 | 15.59232637 |

**Table S6.** TS of H<sub>2</sub> production on AlN through the stepwise PSD mechanism.  
Total energy: -797.126 Hartree

|    |            |             |             |
|----|------------|-------------|-------------|
| Al | 1.77735278 | 1.95730066  | 6.71544145  |
| Al | 5.76240084 | 1.95671353  | 6.71600768  |
| N  | 3.76936845 | 1.95579754  | 6.71375820  |
| N  | 7.75628180 | 1.95668966  | 6.71184776  |
| Al | 3.77468283 | 3.89039029  | 6.72238027  |
| Al | 7.75129928 | 3.89011721  | 6.71974190  |
| N  | 1.77867794 | 3.89104499  | 6.71672392  |
| N  | 5.76131416 | 3.88919763  | 6.72559537  |
| Al | 1.77628952 | 7.78541426  | 6.71365492  |
| Al | 5.76311333 | 7.78458268  | 6.71380384  |
| N  | 3.76875737 | 7.78692685  | 6.71075412  |
| N  | 7.75651167 | 7.78681852  | 6.70993102  |
| N  | 1.77656264 | 9.72040998  | 6.71745691  |
| N  | 5.76247723 | 9.71932960  | 6.71688912  |
| Al | 3.77028074 | 9.72081194  | 6.71716256  |
| Al | 7.75484028 | 9.72088807  | 6.71665971  |
| Al | 1.78433937 | 4.87052655  | 8.37329528  |
| Al | 5.76564179 | 4.87475437  | 8.40457493  |
| N  | 7.75223389 | 4.86532577  | 8.38397280  |
| N  | 3.78373552 | 4.86944108  | 8.39444361  |
| N  | 1.78026773 | 6.80839467  | 8.38246709  |
| N  | 5.76831046 | 6.81068541  | 8.38010901  |
| Al | 7.75690489 | 6.80327672  | 8.37034608  |
| Al | 3.77783499 | 6.80427368  | 8.36923133  |
| Al | 1.78086847 | 10.72155963 | 8.36709501  |
| Al | 5.76690686 | 10.71950417 | 8.36995626  |
| N  | 3.77611572 | 10.71418502 | 8.37522382  |
| N  | 7.75759575 | 10.71498518 | 8.37493912  |
| N  | 1.78078093 | 0.99134574  | 8.38950999  |
| N  | 5.76775982 | 0.99552880  | 8.39389207  |
| Al | 3.77599524 | 0.98535534  | 8.38109987  |
| Al | 7.75862742 | 0.98746143  | 8.38046344  |
| Al | 1.78461056 | 7.81645818  | 10.05662016 |

|    |            |             |             |
|----|------------|-------------|-------------|
| Al | 5.77094217 | 7.79142505  | 10.06442038 |
| N  | 3.78453060 | 7.80376966  | 10.01949815 |
| N  | 7.75652011 | 7.81016500  | 10.01988906 |
| N  | 1.78543325 | 9.74428650  | 10.02785756 |
| N  | 5.76880263 | 9.73659645  | 10.03709813 |
| Al | 3.78044772 | 9.73562132  | 10.05929265 |
| Al | 7.76017345 | 9.73651742  | 10.05778159 |
| Al | 1.78579257 | 1.97333469  | 10.07640994 |
| Al | 5.77198957 | 1.97529490  | 10.09177468 |
| N  | 3.78058938 | 1.95871046  | 10.05625783 |
| N  | 7.76283744 | 1.96993197  | 10.05314424 |
| N  | 1.79969039 | 3.89694230  | 10.02289884 |
| N  | 5.76214692 | 3.91498998  | 10.11890860 |
| Al | 3.78608288 | 3.89715737  | 10.09321982 |
| Al | 7.76183869 | 3.91429029  | 10.07822049 |
| Al | 1.78553380 | 10.77078038 | 11.63907425 |
| Al | 5.77309629 | 10.77272371 | 11.64099564 |
| N  | 3.77788360 | 10.66483429 | 11.75686514 |
| N  | 7.76613553 | 10.66750993 | 11.75315711 |
| N  | 1.78606488 | 1.01119001  | 11.76130580 |
| N  | 5.77343543 | 1.00739774  | 11.77025003 |
| Al | 3.77638269 | 0.89950509  | 11.64255256 |
| Al | 7.76990291 | 0.90376317  | 11.64177969 |
| Al | 1.75974614 | 5.02417546  | 11.57363140 |
| Al | 5.81375432 | 4.89701022  | 11.82472582 |
| N  | 3.69958700 | 4.88620934  | 11.77111565 |
| N  | 7.83662824 | 4.90932600  | 11.69238155 |
| N  | 1.79385090 | 6.92740839  | 11.75203214 |
| N  | 5.76579649 | 6.83813693  | 11.76647474 |
| Al | 3.78544768 | 6.79168295  | 11.62988687 |
| Al | 7.76129237 | 6.78317931  | 11.62137246 |
| Al | 1.77195924 | 1.94403913  | 0.00000000  |
| Al | 1.77195924 | 7.77596708  | 0.00000000  |
| Al | 3.76418840 | 3.88730831  | 0.00000000  |
| Al | 5.75641757 | 1.94383910  | 0.00000000  |
| Al | 5.75641757 | 7.77576706  | 0.00000000  |
| Al | 7.75033693 | 3.88718872  | 0.00000000  |
| N  | 1.77213916 | 3.88747871  | 0.00000000  |
| N  | 3.76478849 | 1.94379942  | 0.00000000  |
| N  | 3.76478849 | 7.77571678  | 0.00000000  |
| N  | 5.75646784 | 3.88735858  | 0.00000000  |
| N  | 7.75007710 | 1.94370946  | 0.00000000  |
| N  | 7.75007710 | 7.77563688  | 0.00000000  |
| N  | 1.77213916 | 9.71939608  | 0.00031010  |
| N  | 5.75646784 | 9.71927595  | 0.00031010  |
| Al | 3.76418840 | 9.71922621  | 0.00031010  |

|    |            |             |            |
|----|------------|-------------|------------|
| Al | 7.75033693 | 9.71911614  | 0.00031010 |
| Al | 1.77195924 | 4.85982822  | 1.68307920 |
| Al | 5.75641757 | 4.85962819  | 1.68307920 |
| N  | 7.75007710 | 4.85949801  | 1.68308925 |
| N  | 3.76478849 | 4.85958797  | 1.68308925 |
| N  | 1.77213916 | 6.80326726  | 1.68315910 |
| N  | 5.75646784 | 6.80314714  | 1.68315910 |
| Al | 7.75033693 | 6.80298733  | 1.68315910 |
| Al | 3.76419846 | 6.80309740  | 1.68315910 |
| Al | 1.77195924 | 10.69132595 | 1.68317921 |
| Al | 5.75641757 | 10.69112592 | 1.68317921 |
| N  | 3.76478849 | 10.69108570 | 1.68317921 |
| N  | 7.75007710 | 10.69099574 | 1.68317921 |
| N  | 1.77213916 | 0.97153987  | 1.68324959 |
| N  | 5.75646784 | 0.97141974  | 1.68324959 |
| Al | 3.76419846 | 0.97136947  | 1.68325912 |
| Al | 7.75033693 | 0.97125940  | 1.68325912 |
| Al | 1.77195924 | 7.77518708  | 3.36602875 |
| Al | 5.75641757 | 7.77498705  | 3.36602875 |
| N  | 3.76478849 | 7.77494683  | 3.36602875 |
| N  | 7.75007710 | 7.77485687  | 3.36602875 |
| N  | 1.77213916 | 9.71862612  | 3.36610866 |
| N  | 5.75646784 | 9.71850600  | 3.36610866 |
| Al | 3.76418840 | 9.71845626  | 3.36610866 |
| Al | 7.75033693 | 9.71833613  | 3.36610866 |
| Al | 1.77195924 | 1.94389943  | 3.36636848 |
| Al | 5.75641757 | 1.94369940  | 3.36636848 |
| N  | 3.76478849 | 1.94365918  | 3.36637854 |
| N  | 7.75007710 | 1.94356922  | 3.36637854 |
| N  | 1.77213916 | 3.88732842  | 3.36644892 |
| N  | 5.75646784 | 3.88720830  | 3.36644892 |
| Al | 3.76418840 | 3.88715856  | 3.36645844 |
| Al | 7.75033693 | 3.88704849  | 3.36645844 |
| Al | 1.77195924 | 10.69097563 | 5.04921802 |
| Al | 5.75641757 | 10.69077560 | 5.04922807 |
| N  | 7.75007710 | 10.69065601 | 5.04922807 |
| N  | 3.76478849 | 10.69073591 | 5.04922807 |
| N  | 1.77213916 | 0.97119961  | 5.04929792 |
| N  | 5.75646784 | 0.97107948  | 5.04930798 |
| Al | 7.75033693 | 0.97091967  | 5.04930798 |
| Al | 3.76419846 | 0.97102974  | 5.04930798 |
| Al | 1.77195924 | 4.85925829  | 5.04931803 |
| Al | 5.75641757 | 4.85905826  | 5.04931803 |
| N  | 3.76478849 | 4.85901805  | 5.04932809 |
| N  | 7.75007710 | 4.85892809  | 5.04932809 |
| N  | 1.77213916 | 6.80268728  | 5.04939794 |



|    |            |            |             |
|----|------------|------------|-------------|
| N  | 5.75646784 | 6.80256716 | 5.04939794  |
| Al | 3.76419846 | 6.80252747 | 5.04940799  |
| Al | 7.75033693 | 6.80240735 | 5.04940799  |
| C  | 5.98242994 | 3.98054475 | 13.83160224 |
| C  | 5.14764784 | 4.42869893 | 14.86027351 |
| C  | 4.33023840 | 3.50677922 | 15.71993549 |
| H  | 3.61354314 | 5.01939445 | 13.37566459 |
| H  | 3.77611169 | 5.14226817 | 14.21944489 |
| H  | 6.97486499 | 4.43585703 | 13.79232030 |
| H  | 5.95227338 | 2.91430849 | 13.57727417 |
| H  | 5.40368998 | 5.39322593 | 15.31413913 |
| H  | 5.00499560 | 3.04060979 | 16.45809226 |
| H  | 3.88073169 | 2.69790522 | 15.12935284 |
| H  | 3.54007407 | 4.03353748 | 16.27134535 |

**Table S7.** TS of H<sub>2</sub> production on AlN through the stepwise PSI/SP mechanism.

Total energy: -776.496 Hartree

|    |            |             |            |
|----|------------|-------------|------------|
| Al | 1.77097467 | 1.94156441  | 6.71548525 |
| Al | 5.75544469 | 1.94136887  | 6.71553245 |
| N  | 3.76332726 | 1.94384086  | 6.71645996 |
| N  | 7.74940596 | 1.94446628  | 6.71485706 |
| Al | 3.76321326 | 3.87527869  | 6.71304399 |
| Al | 7.74900138 | 3.87470596  | 6.71050880 |
| N  | 1.77128589 | 3.87388100  | 6.70994680 |
| N  | 5.75533058 | 3.87376798  | 6.71045304 |
| Al | 1.77296257 | 7.77105559  | 6.71669778 |
| Al | 5.75328679 | 7.77091137  | 6.71669867 |
| N  | 3.76326948 | 7.77254768  | 6.72266546 |
| N  | 7.74931118 | 7.77130622  | 6.71469949 |
| N  | 1.77003344 | 9.70288655  | 6.70689816 |
| N  | 5.75670136 | 9.70271821  | 6.70727111 |
| Al | 3.76330516 | 9.70370990  | 6.71075152 |
| Al | 7.74903371 | 9.70367488  | 6.71004356 |
| Al | 1.77370894 | 4.85362917  | 8.36893022 |
| Al | 5.75040723 | 4.85358884  | 8.36936033 |
| N  | 7.74826878 | 4.84127752  | 8.38282288 |
| N  | 3.76234535 | 4.84267500  | 8.39105975 |
| N  | 1.77410207 | 6.78302550  | 8.37433243 |
| N  | 5.75062776 | 6.78300470  | 8.37464904 |
| Al | 7.74797343 | 6.78460904  | 8.36916168 |
| Al | 3.76212097 | 6.78254404  | 8.39111951 |
| Al | 1.77026295 | 10.68025974 | 8.36995815 |
| Al | 5.75447896 | 10.68020748 | 8.37029853 |
| N  | 3.76258282 | 10.67497070 | 8.37766738 |
| N  | 7.74861762 | 10.67931616 | 8.37532109 |
| N  | 1.77028891 | 0.95348753  | 8.37530007 |

|    |            |             |             |
|----|------------|-------------|-------------|
| N  | 5.75511491 | 0.95355229  | 8.37554994  |
| Al | 3.76247299 | 0.94408161  | 8.36735390  |
| Al | 7.74833696 | 0.94605865  | 8.36532957  |
| Al | 1.77178681 | 7.75404053  | 10.06531459 |
| Al | 5.75018296 | 7.75422636  | 10.06591685 |
| N  | 3.76139226 | 7.75101660  | 10.08309302 |
| N  | 7.74725900 | 7.77132121  | 10.01211686 |
| N  | 1.77147288 | 9.69605064  | 10.03027605 |
| N  | 5.75225831 | 9.69614423  | 10.03076040 |
| Al | 3.76152489 | 9.68828927  | 10.06759237 |
| Al | 7.74747309 | 9.69084147  | 10.05643626 |
| Al | 1.77066790 | 1.91837472  | 10.06764137 |
| Al | 5.75239633 | 1.91832819  | 10.06801874 |
| N  | 3.76191417 | 1.91410951  | 10.04190393 |
| N  | 7.74782463 | 1.92449236  | 10.03345973 |
| N  | 1.78578421 | 3.86098544  | 10.03448151 |
| N  | 5.73660883 | 3.86110272  | 10.03523944 |
| Al | 3.76098337 | 3.84366915  | 10.06939060 |
| Al | 7.74697074 | 3.84782356  | 10.05121399 |
| Al | 1.76588730 | 10.73405700 | 11.63822175 |
| Al | 5.75661642 | 10.73402062 | 11.63863996 |
| N  | 3.76154368 | 10.62944469 | 11.75698090 |
| N  | 7.74766979 | 10.63343171 | 11.74395110 |
| N  | 1.76735143 | 0.97307938  | 11.74760939 |
| N  | 5.75589569 | 0.97315434  | 11.74816867 |
| Al | 3.76121920 | 0.86441346  | 11.64463897 |
| Al | 7.74731919 | 0.86957586  | 11.63931888 |
| Al | 1.72306367 | 4.92804924  | 11.60230225 |
| Al | 5.79694494 | 4.92808804  | 11.60351365 |
| N  | 3.76046381 | 4.78611022  | 11.83164922 |
| N  | 7.74651039 | 4.79421041  | 11.72115906 |
| N  | 1.72961873 | 6.80215821  | 11.71601299 |
| N  | 5.78957612 | 6.80226756  | 11.71727588 |
| Al | 3.75954008 | 6.81706983  | 11.80374415 |
| Al | 7.74598411 | 6.71833099  | 11.61239031 |
| Al | 1.77196000 | 1.94404000  | 0.00000000  |
| Al | 1.77196000 | 7.77597000  | 0.00000000  |
| Al | 3.76419000 | 3.88731000  | 0.00000000  |
| Al | 5.75642000 | 1.94384000  | 0.00000000  |
| Al | 5.75642000 | 7.77577000  | 0.00000000  |
| Al | 7.75034000 | 3.88719000  | 0.00000000  |
| N  | 1.77214000 | 3.88748000  | 0.00000000  |
| N  | 3.76479000 | 1.94380000  | 0.00000000  |
| N  | 3.76479000 | 7.77572000  | 0.00000000  |
| N  | 5.75647000 | 3.88736000  | 0.00000000  |
| N  | 7.75008000 | 1.94371000  | 0.00000000  |

|    |            |             |            |
|----|------------|-------------|------------|
| N  | 7.75008000 | 7.77564000  | 0.00000000 |
| N  | 1.77214000 | 9.71940000  | 0.00031000 |
| N  | 5.75647000 | 9.71928000  | 0.00031000 |
| Al | 3.76419000 | 9.71923000  | 0.00031000 |
| Al | 7.75034000 | 9.71912000  | 0.00031000 |
| Al | 1.77196000 | 4.85983000  | 1.68308000 |
| Al | 5.75642000 | 4.85963000  | 1.68308000 |
| N  | 7.75008000 | 4.85950000  | 1.68309000 |
| N  | 3.76479000 | 4.85959000  | 1.68309000 |
| N  | 1.77214000 | 6.80327000  | 1.68316000 |
| N  | 5.75647000 | 6.80315000  | 1.68316000 |
| Al | 7.75034000 | 6.80299000  | 1.68316000 |
| Al | 3.76420000 | 6.80310000  | 1.68316000 |
| Al | 1.77196000 | 10.69133000 | 1.68318000 |
| Al | 5.75642000 | 10.69113000 | 1.68318000 |
| N  | 3.76479000 | 10.69109000 | 1.68318000 |
| N  | 7.75008000 | 10.69100000 | 1.68318000 |
| N  | 1.77214000 | 0.97154000  | 1.68325000 |
| N  | 5.75647000 | 0.97142000  | 1.68325000 |
| Al | 3.76420000 | 0.97137000  | 1.68326000 |
| Al | 7.75034000 | 0.97126000  | 1.68326000 |
| Al | 1.77196000 | 7.77519000  | 3.36603000 |
| Al | 5.75642000 | 7.77499000  | 3.36603000 |
| N  | 3.76479000 | 7.77495000  | 3.36603000 |
| N  | 7.75008000 | 7.77486000  | 3.36603000 |
| N  | 1.77214000 | 9.71863000  | 3.36611000 |
| N  | 5.75647000 | 9.71851000  | 3.36611000 |
| Al | 3.76419000 | 9.71846000  | 3.36611000 |
| Al | 7.75034000 | 9.71834000  | 3.36611000 |
| Al | 1.77196000 | 1.94390000  | 3.36637000 |
| Al | 5.75642000 | 1.94370000  | 3.36637000 |
| N  | 3.76479000 | 1.94366000  | 3.36638000 |
| N  | 7.75008000 | 1.94357000  | 3.36638000 |
| N  | 1.77214000 | 3.88733000  | 3.36645000 |
| N  | 5.75647000 | 3.88721000  | 3.36645000 |
| Al | 3.76419000 | 3.88716000  | 3.36646000 |
| Al | 7.75034000 | 3.88705000  | 3.36646000 |
| Al | 1.77196000 | 10.69098000 | 5.04922000 |
| Al | 5.75642000 | 10.69078000 | 5.04923000 |
| N  | 7.75008000 | 10.69066000 | 5.04923000 |
| N  | 3.76479000 | 10.69074000 | 5.04923000 |
| N  | 1.77214000 | 0.97120000  | 5.04930000 |
| N  | 5.75647000 | 0.97108000  | 5.04931000 |
| Al | 7.75034000 | 0.97092000  | 5.04931000 |
| Al | 3.76420000 | 0.97103000  | 5.04931000 |
| Al | 1.77196000 | 4.85926000  | 5.04932000 |

|    |            |            |             |
|----|------------|------------|-------------|
| Al | 5.75642000 | 4.85906000 | 5.04932000  |
| N  | 3.76479000 | 4.85902000 | 5.04933000  |
| N  | 7.75008000 | 4.85893000 | 5.04933000  |
| N  | 1.77214000 | 6.80269000 | 5.04940000  |
| N  | 5.75647000 | 6.80257000 | 5.04940000  |
| Al | 3.76420000 | 6.80253000 | 5.04941000  |
| Al | 7.75034000 | 6.80241000 | 5.04941000  |
| H  | 3.75302447 | 6.38893039 | 13.52691686 |
| H  | 3.75605646 | 5.42824171 | 12.97527269 |

**Table S8.** TS of first C-H activation on AlN through the stepwise SP mechanism.

Total energy: -797.178 Hartree

|    |              |               |               |
|----|--------------|---------------|---------------|
| Al | 1.7666406528 | 1.9366805335  | 6.7179128062  |
| Al | 5.7513919207 | 1.9355814213  | 6.7188808394  |
| N  | 3.7590966533 | 1.9371104552  | 6.7190595313  |
| N  | 7.7462501528 | 1.9369271105  | 6.7183456538  |
| Al | 3.7631484162 | 3.8687195003  | 6.7134245563  |
| Al | 7.7392578414 | 3.8688701703  | 6.7118989052  |
| N  | 1.7666961990 | 3.8702833052  | 6.7056682467  |
| N  | 5.7510121855 | 3.8677240897  | 6.7183015443  |
| Al | 1.7659094967 | 7.7639604241  | 6.7204985453  |
| Al | 5.7517866117 | 7.7629734015  | 6.7215869222  |
| N  | 3.7589582666 | 7.7644651143  | 6.7223922580  |
| N  | 7.7459812813 | 7.7644297044  | 6.7219252682  |
| N  | 1.7670316451 | 9.6971241020  | 6.7055411810  |
| N  | 5.7530247263 | 9.6962306238  | 6.7058636056  |
| Al | 3.7604532829 | 9.6981023033  | 6.7092983406  |
| Al | 7.7444146668 | 9.6980513621  | 6.7093767897  |
| Al | 1.7592735781 | 4.8277517507  | 8.3711627296  |
| Al | 5.7453938875 | 4.8323143470  | 8.4052400425  |
| N  | 7.7283133588 | 4.8239063537  | 8.3879550743  |
| N  | 3.7630422366 | 4.8226081260  | 8.3953861073  |
| N  | 1.7617246230 | 6.7646792791  | 8.3773406929  |
| N  | 5.7470116314 | 6.7664170445  | 8.3764890118  |
| Al | 7.7359113242 | 6.7594572932  | 8.3690573005  |
| Al | 3.7568914533 | 6.7590872420  | 8.3694645017  |
| Al | 1.7636509778 | 10.6714009079 | 8.3684920811  |
| Al | 5.7480363923 | 10.6686585239 | 8.3728551967  |
| N  | 3.7593983150 | 10.6632858503 | 8.3808797759  |
| N  | 7.7400893655 | 10.6636950946 | 8.3810758592  |
| N  | 1.7647519280 | 0.9405798453  | 8.3726009320  |
| N  | 5.7483514517 | 0.9456867380  | 8.3768827084  |
| Al | 3.7570583626 | 0.9372566190  | 8.3706047776  |
| Al | 7.7398847402 | 0.9364332144  | 8.3682403487  |
| Al | 1.7560519110 | 7.7459287570  | 10.0648209428 |
| Al | 5.7422679892 | 7.7151111851  | 10.0749687440 |

|    |              |               |               |
|----|--------------|---------------|---------------|
| N  | 3.7573455674 | 7.7262313583  | 10.0389762604 |
| N  | 7.7281177683 | 7.7332248620  | 10.0332582604 |
| N  | 1.7624182842 | 9.6713562261  | 10.0169716063 |
| N  | 5.7444768893 | 9.6583082168  | 10.0275209388 |
| Al | 3.7550670363 | 9.6627743988  | 10.0565601403 |
| Al | 7.7353252413 | 9.6627661272  | 10.0545359927 |
| Al | 1.7575376435 | 1.9086986673  | 10.0624052405 |
| Al | 5.7454934873 | 1.9086887788  | 10.0789335134 |
| N  | 3.7544353575 | 1.9056853221  | 10.0481002086 |
| N  | 7.7367780460 | 1.9030678067  | 10.0386776542 |
| N  | 1.7483227192 | 3.8339492630  | 10.0063413470 |
| N  | 5.7396642669 | 3.8541481116  | 10.1217260506 |
| Al | 3.7454369541 | 3.8429648792  | 10.0779069029 |
| Al | 7.7403762887 | 3.8375936848  | 10.0655326249 |
| Al | 1.7581376330 | 10.6947354066 | 11.6334596900 |
| Al | 5.7454521354 | 10.6930659291 | 11.6320257763 |
| N  | 3.7515361841 | 10.5902147069 | 11.7526984242 |
| N  | 7.7416035224 | 10.5825148449 | 11.7506485636 |
| N  | 1.7566307968 | 0.9317476078  | 11.7280656462 |
| N  | 5.7532821030 | 0.9184088195  | 11.7230074361 |
| Al | 3.7462822853 | 0.8256741515  | 11.6258415069 |
| Al | 7.7398939294 | 0.8194717077  | 11.6156086576 |
| Al | 1.7118758098 | 4.9336463961  | 11.5875449658 |
| Al | 5.8713396901 | 4.8259169698  | 11.7972787667 |
| N  | 3.6051346106 | 4.8022463047  | 11.7303786219 |
| N  | 7.7949873092 | 4.8053787204  | 11.7427247812 |
| N  | 1.7444018127 | 6.8434554658  | 11.7536511744 |
| N  | 5.7366554154 | 6.7372458139  | 11.7690017483 |
| Al | 3.7415404390 | 6.6895327662  | 11.6360936248 |
| Al | 7.7408912042 | 6.7112363363  | 11.6406737485 |
| Al | 1.7719592400 | 1.9440391300  | 0.0000000000  |
| Al | 1.7719592400 | 7.7759670800  | 0.0000000000  |
| Al | 3.7641884000 | 3.8873083100  | 0.0000000000  |
| Al | 5.7564175700 | 1.9438391000  | 0.0000000000  |
| Al | 5.7564175700 | 7.7757670600  | 0.0000000000  |
| Al | 7.7503369300 | 3.8871887200  | 0.0000000000  |
| N  | 1.7721391600 | 3.8874787100  | 0.0000000000  |
| N  | 3.7647884900 | 1.9437994200  | 0.0000000000  |
| N  | 3.7647884900 | 7.7757167800  | 0.0000000000  |
| N  | 5.7564678400 | 3.8873585800  | 0.0000000000  |
| N  | 7.7500771000 | 1.9437094600  | 0.0000000000  |
| N  | 7.7500771000 | 7.7756368800  | 0.0000000000  |
| N  | 1.7721391600 | 9.7193960800  | 0.0003101000  |
| N  | 5.7564678400 | 9.7192759500  | 0.0003101000  |
| Al | 3.7641884000 | 9.7192262100  | 0.0003101000  |
| Al | 7.7503369300 | 9.7191161400  | 0.0003101000  |

|    |              |               |              |
|----|--------------|---------------|--------------|
| Al | 1.7719592400 | 4.8598282200  | 1.6830792000 |
| Al | 5.7564175700 | 4.8596281900  | 1.6830792000 |
| N  | 7.7500771000 | 4.8594980100  | 1.6830892500 |
| N  | 3.7647884900 | 4.8595879700  | 1.6830892500 |
| N  | 1.7721391600 | 6.8032672600  | 1.6831591000 |
| N  | 5.7564678400 | 6.8031471400  | 1.6831591000 |
| Al | 7.7503369300 | 6.8029873300  | 1.6831591000 |
| Al | 3.7641984600 | 6.8030974000  | 1.6831591000 |
| Al | 1.7719592400 | 10.6913259500 | 1.6831792100 |
| Al | 5.7564175700 | 10.6911259200 | 1.6831792100 |
| N  | 3.7647884900 | 10.6910857000 | 1.6831792100 |
| N  | 7.7500771000 | 10.6909957400 | 1.6831792100 |
| N  | 1.7721391600 | 0.9715398700  | 1.6832495900 |
| N  | 5.7564678400 | 0.9714197400  | 1.6832495900 |
| Al | 3.7641984600 | 0.9713694700  | 1.6832591200 |
| Al | 7.7503369300 | 0.9712594000  | 1.6832591200 |
| Al | 1.7719592400 | 7.7751870800  | 3.3660287500 |
| Al | 5.7564175700 | 7.7749870500  | 3.3660287500 |
| N  | 3.7647884900 | 7.7749468300  | 3.3660287500 |
| N  | 7.7500771000 | 7.7748568700  | 3.3660287500 |
| N  | 1.7721391600 | 9.7186261200  | 3.3661086600 |
| N  | 5.7564678400 | 9.7185060000  | 3.3661086600 |
| Al | 3.7641884000 | 9.7184562600  | 3.3661086600 |
| Al | 7.7503369300 | 9.7183361300  | 3.3661086600 |
| Al | 1.7719592400 | 1.9438994300  | 3.3663684800 |
| Al | 5.7564175700 | 1.9436994000  | 3.3663684800 |
| N  | 3.7647884900 | 1.9436591800  | 3.3663785400 |
| N  | 7.7500771000 | 1.9435692200  | 3.3663785400 |
| N  | 1.7721391600 | 3.8873284200  | 3.3664489200 |
| N  | 5.7564678400 | 3.8872083000  | 3.3664489200 |
| Al | 3.7641884000 | 3.8871585600  | 3.3664584400 |
| Al | 7.7503369300 | 3.8870484900  | 3.3664584400 |
| Al | 1.7719592400 | 10.6909756300 | 5.0492180200 |
| Al | 5.7564175700 | 10.6907756000 | 5.0492280700 |
| N  | 7.7500771000 | 10.6906560100 | 5.0492280700 |
| N  | 3.7647884900 | 10.6907359100 | 5.0492280700 |
| N  | 1.7721391600 | 0.9711996100  | 5.0492979200 |
| N  | 5.7564678400 | 0.9710794800  | 5.0493079800 |
| Al | 7.7503369300 | 0.9709196700  | 5.0493079800 |
| Al | 3.7641984600 | 0.9710297400  | 5.0493079800 |
| Al | 1.7719592400 | 4.8592582900  | 5.0493180300 |
| Al | 5.7564175700 | 4.8590582600  | 5.0493180300 |
| N  | 3.7647884900 | 4.8590180500  | 5.0493280900 |
| N  | 7.7500771000 | 4.8589280900  | 5.0493280900 |
| N  | 1.7721391600 | 6.8026872800  | 5.0493979400 |
| N  | 5.7564678400 | 6.8025671600  | 5.0493979400 |

|    |              |              |               |
|----|--------------|--------------|---------------|
| Al | 3.7641984600 | 6.8025274700 | 5.0494079900  |
| Al | 7.7503369300 | 6.8024073500 | 5.0494079900  |
| C  | 4.7520461206 | 5.1678553336 | 14.7778971232 |
| C  | 5.1577589289 | 4.0197313429 | 13.8406625138 |
| C  | 4.3397029470 | 2.7561453549 | 14.1717410587 |
| H  | 5.3711201615 | 6.0648195485 | 14.6436753631 |
| H  | 4.3870656338 | 4.3483609369 | 12.7333991481 |
| H  | 3.7037635428 | 5.4601861860 | 14.5902638593 |
| H  | 4.8075778982 | 4.8637131614 | 15.8353844372 |
| H  | 6.2273195910 | 3.7846060164 | 13.9784003392 |
| H  | 4.7934362370 | 1.8652731595 | 13.7143738579 |
| H  | 3.2959094026 | 2.8456704512 | 13.8205513870 |
| H  | 4.2878305285 | 2.5777945110 | 15.2582083724 |

**Table S9.** TS of second C-H activation on AlN through the stepwise SP mechanism.

Total energy: -797.137 Hartree

|    |            |             |            |
|----|------------|-------------|------------|
| Al | 1.77028176 | 1.92423764  | 6.72246259 |
| Al | 5.75489016 | 1.92406223  | 6.72389063 |
| N  | 3.76245636 | 1.92427203  | 6.72668405 |
| N  | 7.74914435 | 1.92565625  | 6.72544031 |
| Al | 3.76792168 | 3.85902534  | 6.70410645 |
| Al | 7.74227296 | 3.85926514  | 6.70162358 |
| N  | 1.77123709 | 3.85845042  | 6.69305091 |
| N  | 5.75354714 | 3.85748575  | 6.70852450 |
| Al | 1.77438748 | 7.75568683  | 6.72571626 |
| Al | 5.75150004 | 7.75550101  | 6.72603698 |
| N  | 3.76226199 | 7.75542097  | 6.73389795 |
| N  | 7.75011267 | 7.75499447  | 6.72266532 |
| N  | 1.76991841 | 9.68988749  | 6.70421179 |
| N  | 5.75651103 | 9.68972230  | 6.70424750 |
| Al | 3.76373993 | 9.68782203  | 6.70970732 |
| Al | 7.74824361 | 9.68809924  | 6.70867291 |
| Al | 1.76693843 | 4.82494754  | 8.34600577 |
| Al | 5.75297111 | 4.83248595  | 8.38725793 |
| N  | 7.73539550 | 4.81932967  | 8.37150800 |
| N  | 3.77072879 | 4.81445194  | 8.38650151 |
| N  | 1.77802862 | 6.75567270  | 8.38116897 |
| N  | 5.74676836 | 6.76345703  | 8.37997518 |
| Al | 7.74519845 | 6.76321544  | 8.37312756 |
| Al | 3.76471290 | 6.75716429  | 8.40767743 |
| Al | 1.77189939 | 10.64121956 | 8.38084145 |
| Al | 5.75225620 | 10.64040713 | 8.38446540 |
| N  | 3.76460542 | 10.63211150 | 8.39307956 |
| N  | 7.74626130 | 10.63997873 | 8.38791757 |
| N  | 1.77004866 | 0.91238784  | 8.37078097 |
| N  | 5.75335583 | 0.92015970  | 8.37774455 |

|    |            |             |             |
|----|------------|-------------|-------------|
| Al | 3.76349433 | 0.90099278  | 8.36486714  |
| Al | 7.74533605 | 0.90472766  | 8.36411671  |
| Al | 1.78345868 | 7.71391211  | 10.09339208 |
| Al | 5.74372618 | 7.69181736  | 10.09452910 |
| N  | 3.76536592 | 7.67691514  | 10.13756091 |
| N  | 7.74899996 | 7.73375828  | 10.01410855 |
| N  | 1.77547268 | 9.65454383  | 10.04085774 |
| N  | 5.74957653 | 9.64726727  | 10.04971489 |
| Al | 3.76485184 | 9.62623746  | 10.08821493 |
| Al | 7.74535715 | 9.64213857  | 10.06424283 |
| Al | 1.76418312 | 1.87308744  | 10.05710408 |
| Al | 5.75446458 | 1.87750867  | 10.08019993 |
| N  | 3.76197686 | 1.86103030  | 10.04409852 |
| N  | 7.74328403 | 1.86794755  | 10.03770649 |
| N  | 1.77020174 | 3.79662162  | 9.95675092  |
| N  | 5.73815050 | 3.82195106  | 10.08592935 |
| Al | 3.76262008 | 3.77955492  | 10.01153115 |
| Al | 7.74045192 | 3.79538054  | 10.02015180 |
| Al | 1.76532281 | 10.68335520 | 11.64981129 |
| Al | 5.75621226 | 10.68481305 | 11.65536866 |
| N  | 3.76082981 | 10.57589707 | 11.77623965 |
| N  | 7.74764124 | 10.58537447 | 11.76115616 |
| N  | 1.76919280 | 0.93118265  | 11.75045323 |
| N  | 5.75187719 | 0.93200377  | 11.76872011 |
| Al | 3.75688731 | 0.80062863  | 11.63334192 |
| Al | 7.74946627 | 0.82028558  | 11.63965970 |
| Al | 1.68703410 | 4.92820324  | 11.48803314 |
| Al | 5.89428682 | 4.85163288  | 11.74292883 |
| N  | 3.62857981 | 4.71757047  | 11.70945305 |
| N  | 7.80811060 | 4.73593448  | 11.67107661 |
| N  | 1.71373035 | 6.78215081  | 11.74001153 |
| N  | 5.82709432 | 6.71521228  | 11.71664299 |
| Al | 3.77281461 | 6.73072564  | 11.92620352 |
| Al | 7.75404580 | 6.67427550  | 11.60213964 |
| Al | 1.77195919 | 1.94403914  | 0.00000000  |
| Al | 1.77195919 | 7.77596588  | 0.00000000  |
| Al | 3.76418788 | 3.88730784  | 0.00000000  |
| Al | 5.75641704 | 1.94383913  | 0.00000000  |
| Al | 5.75641704 | 7.77576587  | 0.00000000  |
| Al | 7.75033581 | 3.88718802  | 0.00000000  |
| N  | 1.77213916 | 3.88747801  | 0.00000000  |
| N  | 3.76478792 | 1.94379927  | 0.00000000  |
| N  | 3.76478792 | 7.77571575  | 0.00000000  |
| N  | 5.75646716 | 3.88735796  | 0.00000000  |
| N  | 7.75007589 | 1.94370929  | 0.00000000  |
| N  | 7.75007589 | 7.77563579  | 0.00000000  |



|    |            |             |            |
|----|------------|-------------|------------|
| N  | 1.77213916 | 9.71939496  | 0.00031004 |
| N  | 5.75646716 | 9.71927491  | 0.00031004 |
| Al | 3.76418788 | 9.71922502  | 0.00031004 |
| Al | 7.75033581 | 9.71911499  | 0.00031004 |
| Al | 1.77195919 | 4.85982733  | 1.68307917 |
| Al | 5.75641704 | 4.85962731  | 1.68307917 |
| N  | 7.75007589 | 4.85949723  | 1.68308920 |
| N  | 3.76478792 | 4.85958722  | 1.68308920 |
| N  | 1.77213916 | 6.80326643  | 1.68315913 |
| N  | 5.75646716 | 6.80314638  | 1.68315913 |
| Al | 7.75033581 | 6.80298646  | 1.68315913 |
| Al | 3.76419791 | 6.80309649  | 1.68315913 |
| Al | 1.77195919 | 10.69132443 | 1.68317918 |
| Al | 5.75641704 | 10.69112442 | 1.68317918 |
| N  | 3.76478792 | 10.69108433 | 1.68317918 |
| N  | 7.75007589 | 10.69099434 | 1.68317918 |
| N  | 1.77213916 | 0.97153947  | 1.68324935 |
| N  | 5.75646716 | 0.97141942  | 1.68324935 |
| Al | 3.76419791 | 0.97136929  | 1.68325914 |
| Al | 7.75033581 | 0.97125926  | 1.68325914 |
| Al | 1.77195919 | 7.77518588  | 3.36602803 |
| Al | 5.75641704 | 7.77498586  | 3.36602803 |
| N  | 3.76478792 | 7.77494577  | 3.36602803 |
| N  | 7.75007589 | 7.77485579  | 3.36602803 |
| N  | 1.77213916 | 9.71862498  | 3.36610799 |
| N  | 5.75646716 | 9.71850493  | 3.36610799 |
| Al | 3.76418788 | 9.71845505  | 3.36610799 |
| Al | 7.75033581 | 9.71833499  | 3.36610799 |
| Al | 1.77195919 | 1.94389927  | 3.36636792 |
| Al | 5.75641704 | 1.94369926  | 3.36636792 |
| N  | 3.76478792 | 1.94365917  | 3.36637794 |
| N  | 7.75007589 | 1.94356918  | 3.36637794 |
| N  | 1.77213916 | 3.88732789  | 3.36644810 |
| N  | 5.75646716 | 3.88720783  | 3.36644810 |
| Al | 3.76418788 | 3.88715795  | 3.36645790 |
| Al | 7.75033581 | 3.88704792  | 3.36645790 |
| Al | 1.77195919 | 10.69097430 | 5.04921723 |
| Al | 5.75641704 | 10.69077429 | 5.04922726 |
| N  | 7.75007589 | 10.69065446 | 5.04922726 |
| N  | 3.76478792 | 10.69073442 | 5.04922726 |
| N  | 1.77213916 | 0.97119936  | 5.04929720 |
| N  | 5.75646716 | 0.97107930  | 5.04930722 |
| Al | 7.75033581 | 0.97091938  | 5.04930722 |
| Al | 3.76419791 | 0.97102941  | 5.04930722 |
| Al | 1.77195919 | 4.85925736  | 5.04931724 |
| Al | 5.75641704 | 4.85905735  | 5.04931724 |

|    |            |            |             |
|----|------------|------------|-------------|
| N  | 3.76478792 | 4.85901725 | 5.04932726  |
| N  | 7.75007589 | 4.85892726 | 5.04932726  |
| N  | 1.77213916 | 6.80268644 | 5.04939720  |
| N  | 5.75646716 | 6.80256639 | 5.04939720  |
| Al | 3.76419791 | 6.80252653 | 5.04940723  |
| Al | 7.75033581 | 6.80240648 | 5.04940723  |
| C  | 6.95824276 | 4.42625763 | 14.69740721 |
| C  | 5.59173914 | 4.32382503 | 14.04362558 |
| C  | 4.53770036 | 5.07631017 | 14.55074903 |
| H  | 7.76036527 | 4.12067077 | 14.01806252 |
| H  | 3.72052435 | 4.14615649 | 12.55330514 |
| H  | 7.15941447 | 5.46200278 | 15.00761534 |
| H  | 7.00212350 | 3.79426430 | 15.59849599 |
| H  | 5.33832044 | 3.32387689 | 13.64850680 |
| H  | 3.95988971 | 6.63537584 | 13.61037815 |
| H  | 4.71896660 | 5.80198892 | 15.34380159 |
| H  | 3.49873261 | 4.76917752 | 14.45338891 |

**Table S10.** TS of C-H activation of propane on Ga/AlN through the concerted mechanism.  
Total energy: -869.591 Hartree

|    |            |             |            |
|----|------------|-------------|------------|
| Al | 1.77662527 | 1.96384425  | 6.71263057 |
| Al | 5.76090129 | 1.96346251  | 6.71373424 |
| N  | 3.76855731 | 1.96293879  | 6.71119818 |
| N  | 7.75485170 | 1.96456100  | 6.70881638 |
| Al | 3.77295982 | 3.89683135  | 6.72310223 |
| Al | 7.75068988 | 3.89678774  | 6.71866729 |
| N  | 1.77831793 | 3.89709617  | 6.71570192 |
| N  | 5.75925092 | 3.89632434  | 6.72420182 |
| Al | 1.77514499 | 7.79572970  | 6.70804991 |
| Al | 5.76169385 | 7.79454300  | 6.70819956 |
| N  | 3.76764660 | 7.79622810  | 6.70612467 |
| N  | 7.75509438 | 7.79654198  | 6.70403610 |
| N  | 1.77521760 | 9.72887687  | 6.71906274 |
| N  | 5.76130577 | 9.72745565  | 6.71852405 |
| Al | 3.76907003 | 9.72915829  | 6.71853966 |
| Al | 7.75350835 | 9.72942238  | 6.71800128 |
| Al | 1.78477409 | 4.89204934  | 8.36097788 |
| Al | 5.76114323 | 4.89693144  | 8.38877580 |
| N  | 7.75206268 | 4.88751418  | 8.37322907 |
| N  | 3.77905675 | 4.89133863  | 8.39147252 |
| N  | 1.77772154 | 6.82947880  | 8.38008264 |
| N  | 5.76602329 | 6.82932266  | 8.37740041 |
| Al | 7.75542869 | 6.82373488  | 8.36822485 |
| Al | 3.77475117 | 6.82319721  | 8.36956333 |
| Al | 1.77934714 | 10.73661696 | 8.36478258 |

|    |            |             |             |
|----|------------|-------------|-------------|
| Al | 5.76386876 | 10.73390734 | 8.36786611  |
| N  | 3.77404115 | 10.72774441 | 8.37239560  |
| N  | 7.75515699 | 10.73033369 | 8.37152138  |
| N  | 1.77898413 | 1.00564501  | 8.38946575  |
| N  | 5.76532585 | 1.00843601  | 8.39401690  |
| Al | 3.77334167 | 0.99892164  | 8.38217052  |
| Al | 7.75714201 | 1.00183234  | 8.38057689  |
| Al | 1.78436091 | 7.84321342  | 10.04952979 |
| Al | 5.76469224 | 7.81445342  | 10.05599116 |
| N  | 3.78198880 | 7.81382585  | 10.02625445 |
| N  | 7.75125574 | 7.83371360  | 10.01567342 |
| N  | 1.78396289 | 9.76739783  | 10.02695496 |
| N  | 5.76382806 | 9.75802541  | 10.03700462 |
| Al | 3.77751620 | 9.75620817  | 10.06293113 |
| Al | 7.75648832 | 9.76058201  | 10.05776747 |
| Al | 1.78381081 | 1.99266577  | 10.07476990 |
| Al | 5.76862940 | 1.98983889  | 10.08773926 |
| N  | 3.77467708 | 1.97794798  | 10.05673472 |
| N  | 7.76266453 | 1.99386352  | 10.04938637 |
| N  | 1.80052684 | 3.92350464  | 10.00716003 |
| N  | 5.75267537 | 3.92434160  | 10.07389383 |
| Al | 3.78127129 | 3.91033809  | 10.09418158 |
| Al | 7.76794152 | 3.93107056  | 10.05647771 |
| Al | 1.78153798 | 10.80005542 | 11.63764571 |
| Al | 5.76960912 | 10.80005455 | 11.63971534 |
| N  | 3.77402434 | 10.69163614 | 11.75375987 |
| N  | 7.76266249 | 10.69643369 | 11.74693093 |
| N  | 1.78178751 | 1.03983725  | 11.76149184 |
| N  | 5.77024505 | 1.03473468  | 11.76637897 |
| Al | 3.77457293 | 0.92654207  | 11.65183515 |
| Al | 7.76394511 | 0.93539721  | 11.64898774 |
| Al | 1.73625990 | 5.06412425  | 11.55403031 |
| Ga | 5.89427644 | 4.88312124  | 11.85728773 |
| N  | 3.60593097 | 4.87865952  | 11.83848314 |
| N  | 7.87699877 | 4.93790911  | 11.68927670 |
| N  | 1.78959588 | 6.96727768  | 11.74174008 |
| N  | 5.75864761 | 6.89720664  | 11.77654162 |
| Al | 3.78165890 | 6.81994371  | 11.66508908 |
| Al | 7.76538256 | 6.82974499  | 11.62969577 |
| Al | 1.77195871 | 1.94403860  | 0.00000000  |
| Al | 1.77195871 | 7.77596391  | 0.00000000  |
| Al | 3.76418682 | 3.88730672  | 0.00000000  |
| Al | 5.75641545 | 1.94383857  | 0.00000000  |
| Al | 5.75641545 | 7.77576388  | 0.00000000  |
| Al | 7.75033375 | 3.88718713  | 0.00000000  |
| N  | 1.77213863 | 3.88747712  | 0.00000000  |

|    |            |             |            |
|----|------------|-------------|------------|
| N  | 3.76478690 | 1.94379889  | 0.00000000 |
| N  | 3.76478690 | 7.77571361  | 0.00000000 |
| N  | 5.75646572 | 3.88735700  | 0.00000000 |
| N  | 7.75007392 | 1.94370893  | 0.00000000 |
| N  | 7.75007392 | 7.77563370  | 0.00000000 |
| N  | 1.77213863 | 9.71939237  | 0.00031010 |
| N  | 5.75646572 | 9.71927225  | 0.00031010 |
| Al | 3.76418682 | 9.71922251  | 0.00031010 |
| Al | 7.75033375 | 9.71911244  | 0.00031010 |
| Al | 1.77195871 | 4.85982610  | 1.68307867 |
| Al | 5.75641545 | 4.85962607  | 1.68307867 |
| N  | 7.75007392 | 4.85949589  | 1.68308872 |
| N  | 3.76478690 | 4.85958585  | 1.68308872 |
| N  | 1.77213863 | 6.80326462  | 1.68315858 |
| N  | 5.75646572 | 6.80314449  | 1.68315858 |
| Al | 7.75033375 | 6.80298468  | 1.68315858 |
| Al | 3.76419687 | 6.80309475  | 1.68315858 |
| Al | 1.77195871 | 10.69132171 | 1.68317868 |
| Al | 5.75641545 | 10.69112168 | 1.68317868 |
| N  | 3.76478690 | 10.69108147 | 1.68317868 |
| N  | 7.75007392 | 10.69099151 | 1.68317868 |
| N  | 1.77213863 | 0.97153934  | 1.68324906 |
| N  | 5.75646572 | 0.97141921  | 1.68324906 |
| Al | 3.76419687 | 0.97136894  | 1.68325859 |
| Al | 7.75033375 | 0.97125887  | 1.68325859 |
| Al | 1.77195871 | 7.77518390  | 3.36602716 |
| Al | 5.75641545 | 7.77498387  | 3.36602716 |
| N  | 3.76478690 | 7.77494366  | 3.36602716 |
| N  | 7.75007392 | 7.77485370  | 3.36602716 |
| N  | 1.77213863 | 9.71862242  | 3.36610760 |
| N  | 5.75646572 | 9.71850230  | 3.36610760 |
| Al | 3.76418682 | 9.71845255  | 3.36610760 |
| Al | 7.75033375 | 9.71833243  | 3.36610760 |
| Al | 1.77195871 | 1.94389890  | 3.36636689 |
| Al | 5.75641545 | 1.94369887  | 3.36636689 |
| N  | 3.76478690 | 1.94365865  | 3.36637748 |
| N  | 7.75007392 | 1.94356869  | 3.36637748 |
| N  | 1.77213863 | 3.88732683  | 3.36644733 |
| N  | 5.75646572 | 3.88720671  | 3.36644733 |
| Al | 3.76418682 | 3.88715697  | 3.36645685 |
| Al | 7.75033375 | 3.88704690  | 3.36645685 |
| Al | 1.77195871 | 10.69097140 | 5.04921590 |
| Al | 5.75641545 | 10.69077137 | 5.04922596 |
| N  | 7.75007392 | 10.69065177 | 5.04922596 |
| N  | 3.76478690 | 10.69073168 | 5.04922596 |
| N  | 1.77213863 | 0.97119908  | 5.04929581 |

|    |            |            |             |
|----|------------|------------|-------------|
| N  | 5.75646572 | 0.97107895 | 5.04930586  |
| Al | 7.75033375 | 0.97091914 | 5.04930586  |
| Al | 3.76419687 | 0.97102921 | 5.04930586  |
| Al | 1.77195871 | 4.85925618 | 5.04931592  |
| Al | 5.75641545 | 4.85905615 | 5.04931592  |
| N  | 3.76478690 | 4.85901593 | 5.04932597  |
| N  | 7.75007392 | 4.85892597 | 5.04932597  |
| N  | 1.77213863 | 6.80268464 | 5.04939582  |
| N  | 5.75646572 | 6.80256451 | 5.04939582  |
| Al | 3.76419687 | 6.80252483 | 5.04940588  |
| Al | 7.75033375 | 6.80240470 | 5.04940588  |
| C  | 5.08198237 | 4.06037226 | 14.60416619 |
| C  | 3.72997713 | 4.47900961 | 14.57634304 |
| C  | 3.37763156 | 5.90854753 | 14.91467356 |
| H  | 5.63027891 | 4.13468058 | 13.38790391 |
| H  | 3.63820950 | 4.58308642 | 12.96860117 |
| H  | 5.82139156 | 4.71347640 | 15.08525357 |
| H  | 5.29729159 | 2.99947830 | 14.76575326 |
| H  | 2.95357867 | 3.71771256 | 14.69317334 |
| H  | 4.09334942 | 6.61017803 | 14.44253027 |
| H  | 3.41879442 | 6.12886784 | 15.99569512 |
| H  | 2.37420233 | 6.19026958 | 14.56359112 |

**Table S11.** TS of H<sub>2</sub> production on Ga/AlN through the concerted mechanism.

Total energy: -848.952 Hartree

|    |            |            |            |
|----|------------|------------|------------|
| Al | 1.77325994 | 1.94443645 | 6.71637526 |
| Al | 5.75782900 | 1.94378011 | 6.71691886 |
| N  | 3.76523562 | 1.94567136 | 6.71630098 |
| N  | 7.75149446 | 1.94645259 | 6.71520783 |
| Al | 3.76797218 | 3.87732070 | 6.71499783 |
| Al | 7.74838523 | 3.87777266 | 6.71125489 |
| N  | 1.77335919 | 3.87675029 | 6.70669588 |
| N  | 5.75671972 | 3.87544989 | 6.71623864 |
| Al | 1.77262856 | 7.77493068 | 6.71646038 |
| Al | 5.75852290 | 7.77423618 | 6.71673377 |
| N  | 3.76525699 | 7.77595913 | 6.71727084 |
| N  | 7.75151089 | 7.77656575 | 6.71527879 |
| N  | 1.77264603 | 9.70663651 | 6.71030598 |
| N  | 5.75849062 | 9.70595179 | 6.71023153 |
| Al | 3.76646276 | 9.70862587 | 6.71268198 |
| Al | 7.75101353 | 9.70885513 | 6.71200303 |
| Al | 1.77487843 | 4.85196632 | 8.36380308 |
| Al | 5.75612623 | 4.85803126 | 8.38407029 |
| N  | 7.74435107 | 4.85199455 | 8.37478205 |
| N  | 3.77102053 | 4.85106566 | 8.38750162 |
| N  | 1.77218367 | 6.78896069 | 8.38004003 |

|    |            |             |             |
|----|------------|-------------|-------------|
| N  | 5.75911189 | 6.78929893  | 8.38015977  |
| Al | 7.75072365 | 6.78537066  | 8.37003972  |
| Al | 3.76740402 | 6.78345990  | 8.37162204  |
| Al | 1.77489846 | 10.69195766 | 8.36745629  |
| Al | 5.75854458 | 10.69035126 | 8.37024991  |
| N  | 3.76862734 | 10.68541388 | 8.37781926  |
| N  | 7.75015474 | 10.68691437 | 8.37670239  |
| N  | 1.77354134 | 0.95888287  | 8.37736440  |
| N  | 5.75883120 | 0.96322743  | 8.38144397  |
| Al | 3.76757555 | 0.95760413  | 8.37398754  |
| Al | 7.75158173 | 0.95693868  | 8.37215597  |
| Al | 1.77713498 | 7.78425110  | 10.06016072 |
| Al | 5.75702428 | 7.76367773  | 10.06585342 |
| N  | 3.77306081 | 7.75785866  | 10.03833042 |
| N  | 7.74417743 | 7.77558003  | 10.02788236 |
| N  | 1.77604039 | 9.70779851  | 10.02381936 |
| N  | 5.75743042 | 9.70145227  | 10.03410384 |
| Al | 3.76978017 | 9.70006901  | 10.06262460 |
| Al | 7.75071524 | 9.70506235  | 10.05790881 |
| Al | 1.77533003 | 1.93597113  | 10.06528045 |
| Al | 5.75891740 | 1.93167061  | 10.08053261 |
| N  | 3.76741739 | 1.93334431  | 10.04693148 |
| N  | 7.75091582 | 1.93302427  | 10.04263479 |
| N  | 1.76928257 | 3.86198613  | 10.00215723 |
| N  | 5.75366264 | 3.86839981  | 10.06837134 |
| Al | 3.75556230 | 3.87524047  | 10.08412883 |
| Al | 7.76873532 | 3.86859027  | 10.04911355 |
| Al | 1.77519563 | 10.74018483 | 11.63726077 |
| Al | 5.76073167 | 10.74247436 | 11.64058485 |
| N  | 3.76659888 | 10.63563981 | 11.75138318 |
| N  | 7.75440023 | 10.63624941 | 11.74789393 |
| N  | 1.77386835 | 0.97824073  | 11.74596299 |
| N  | 5.76099881 | 0.97614877  | 11.75484475 |
| Al | 3.76550411 | 0.87137582  | 11.63868779 |
| Al | 7.75600616 | 0.87427590  | 11.63876401 |
| Al | 1.74800135 | 4.97225779  | 11.59066181 |
| Ga | 5.87778123 | 4.90450297  | 11.75479036 |
| N  | 3.61831060 | 4.82597427  | 11.77169936 |
| N  | 7.84472722 | 4.86420995  | 11.71344175 |
| N  | 1.76977998 | 6.89570423  | 11.75700369 |
| N  | 5.75525947 | 6.85536194  | 11.79839808 |
| Al | 3.75032992 | 6.72913614  | 11.65529199 |
| Al | 7.78299865 | 6.77570021  | 11.64762908 |
| Al | 1.77196000 | 1.94404000  | 0.00000000  |
| Al | 1.77196000 | 7.77597000  | 0.00000000  |
| Al | 3.76419000 | 3.88731000  | 0.00000000  |

|    |            |             |            |
|----|------------|-------------|------------|
| Al | 5.75642000 | 1.94384000  | 0.00000000 |
| Al | 5.75642000 | 7.77577000  | 0.00000000 |
| Al | 7.75034000 | 3.88719000  | 0.00000000 |
| N  | 1.77214000 | 3.88748000  | 0.00000000 |
| N  | 3.76479000 | 1.94380000  | 0.00000000 |
| N  | 3.76479000 | 7.77572000  | 0.00000000 |
| N  | 5.75647000 | 3.88736000  | 0.00000000 |
| N  | 7.75008000 | 1.94371000  | 0.00000000 |
| N  | 7.75008000 | 7.77564000  | 0.00000000 |
| N  | 1.77214000 | 9.71940000  | 0.00031000 |
| N  | 5.75647000 | 9.71928000  | 0.00031000 |
| Al | 3.76419000 | 9.71923000  | 0.00031000 |
| Al | 7.75034000 | 9.71912000  | 0.00031000 |
| Al | 1.77196000 | 4.85983000  | 1.68308000 |
| Al | 5.75642000 | 4.85963000  | 1.68308000 |
| N  | 7.75008000 | 4.85950000  | 1.68309000 |
| N  | 3.76479000 | 4.85959000  | 1.68309000 |
| N  | 1.77214000 | 6.80327000  | 1.68316000 |
| N  | 5.75647000 | 6.80315000  | 1.68316000 |
| Al | 7.75034000 | 6.80299000  | 1.68316000 |
| Al | 3.76420000 | 6.80310000  | 1.68316000 |
| Al | 1.77196000 | 10.69133000 | 1.68318000 |
| Al | 5.75642000 | 10.69113000 | 1.68318000 |
| N  | 3.76479000 | 10.69109000 | 1.68318000 |
| N  | 7.75008000 | 10.69100000 | 1.68318000 |
| N  | 1.77214000 | 0.97154000  | 1.68325000 |
| N  | 5.75647000 | 0.97142000  | 1.68325000 |
| Al | 3.76420000 | 0.97137000  | 1.68326000 |
| Al | 7.75034000 | 0.97126000  | 1.68326000 |
| Al | 1.77196000 | 7.77519000  | 3.36603000 |
| Al | 5.75642000 | 7.77499000  | 3.36603000 |
| N  | 3.76479000 | 7.77495000  | 3.36603000 |
| N  | 7.75008000 | 7.77486000  | 3.36603000 |
| N  | 1.77214000 | 9.71863000  | 3.36611000 |
| N  | 5.75647000 | 9.71851000  | 3.36611000 |
| Al | 3.76419000 | 9.71846000  | 3.36611000 |
| Al | 7.75034000 | 9.71834000  | 3.36611000 |
| Al | 1.77196000 | 1.94390000  | 3.36637000 |
| Al | 5.75642000 | 1.94370000  | 3.36637000 |
| N  | 3.76479000 | 1.94366000  | 3.36638000 |
| N  | 7.75008000 | 1.94357000  | 3.36638000 |
| N  | 1.77214000 | 3.88733000  | 3.36645000 |
| N  | 5.75647000 | 3.88721000  | 3.36645000 |
| Al | 3.76419000 | 3.88716000  | 3.36646000 |
| Al | 7.75034000 | 3.88705000  | 3.36646000 |
| Al | 1.77196000 | 10.69098000 | 5.04922000 |

|    |            |             |             |
|----|------------|-------------|-------------|
| Al | 5.75642000 | 10.69078000 | 5.04923000  |
| N  | 7.75008000 | 10.69066000 | 5.04923000  |
| N  | 3.76479000 | 10.69074000 | 5.04923000  |
| N  | 1.77214000 | 0.97120000  | 5.04930000  |
| N  | 5.75647000 | 0.97108000  | 5.04931000  |
| Al | 7.75034000 | 0.97092000  | 5.04931000  |
| Al | 3.76420000 | 0.97103000  | 5.04931000  |
| Al | 1.77196000 | 4.85926000  | 5.04932000  |
| Al | 5.75642000 | 4.85906000  | 5.04932000  |
| N  | 3.76479000 | 4.85902000  | 5.04933000  |
| N  | 7.75008000 | 4.85893000  | 5.04933000  |
| N  | 1.77214000 | 6.80269000  | 5.04940000  |
| N  | 5.75647000 | 6.80257000  | 5.04940000  |
| Al | 3.76420000 | 6.80253000  | 5.04941000  |
| Al | 7.75034000 | 6.80241000  | 5.04941000  |
| H  | 4.53328393 | 4.23497177  | 12.85752717 |
| H  | 5.32137481 | 3.99115928  | 13.29412990 |

**Table S12.** TS of first C-H activation on Ga/AlN through the stepwise PS mechanism.

Total energy: -869.617 Hartree

|    |            |             |            |
|----|------------|-------------|------------|
| Al | 1.77128933 | 1.95476582  | 6.71383116 |
| Al | 5.75568048 | 1.95392190  | 6.71482561 |
| N  | 3.76318076 | 1.95430778  | 6.71248134 |
| N  | 7.74980407 | 1.95510440  | 6.71181777 |
| Al | 3.76750501 | 3.88721488  | 6.71832342 |
| Al | 7.74527069 | 3.88751247  | 6.71409579 |
| N  | 1.77203203 | 3.88767702  | 6.70949973 |
| N  | 5.75476674 | 3.88578669  | 6.72044847 |
| Al | 1.77073245 | 7.78509991  | 6.71292490 |
| Al | 5.75639471 | 7.78416961  | 6.71355273 |
| N  | 3.76308318 | 7.78544103  | 6.71193298 |
| N  | 7.75007812 | 7.78609769  | 6.70999537 |
| N  | 1.77062030 | 9.71820278  | 6.71466636 |
| N  | 5.75644529 | 9.71709542  | 6.71447061 |
| Al | 3.76446710 | 9.71888395  | 6.71557811 |
| Al | 7.74847987 | 9.71905776  | 6.71499195 |
| Al | 1.77282748 | 4.87068518  | 8.36015204 |
| Al | 5.75367659 | 4.87787425  | 8.38843054 |
| N  | 7.73899353 | 4.87097687  | 8.37179267 |
| N  | 3.77172455 | 4.86983708  | 8.38681121 |
| N  | 1.76978764 | 6.80948888  | 8.38226826 |
| N  | 5.75649156 | 6.81031442  | 8.38180666 |
| Al | 7.74672935 | 6.80479823  | 8.36971193 |
| Al | 3.76591809 | 6.80302671  | 8.37215825 |
| Al | 1.77119275 | 10.71511253 | 8.36526813 |
| Al | 5.75462980 | 10.71279816 | 8.36935401 |



|    |            |             |             |
|----|------------|-------------|-------------|
| N  | 3.76599871 | 10.70690361 | 8.37561215  |
| N  | 7.74588554 | 10.70826123 | 8.37445900  |
| N  | 1.77038931 | 0.98224225  | 8.38210281  |
| N  | 5.75552693 | 0.98780868  | 8.38810921  |
| Al | 3.76448493 | 0.97995129  | 8.37734365  |
| Al | 7.74751616 | 0.97886684  | 8.37596370  |
| Al | 1.77428335 | 7.81499224  | 10.05724984 |
| Al | 5.75435479 | 7.78677263  | 10.06605983 |
| N  | 3.77258328 | 7.78647258  | 10.03460900 |
| N  | 7.73915125 | 7.80358517  | 10.02261791 |
| N  | 1.77196982 | 9.73799932  | 10.02384227 |
| N  | 5.75332142 | 9.72847939  | 10.03667408 |
| Al | 3.76625099 | 9.72585863  | 10.06132850 |
| Al | 7.74510001 | 9.73104671  | 10.05653504 |
| Al | 1.77154514 | 1.96405078  | 10.06689699 |
| Al | 5.75470655 | 1.96039117  | 10.08578755 |
| N  | 3.76437873 | 1.95893674  | 10.05105986 |
| N  | 7.74658419 | 1.95678473  | 10.04777194 |
| N  | 1.76583466 | 3.88420421  | 9.99247587  |
| N  | 5.75290834 | 3.89688072  | 10.08406116 |
| Al | 3.75396701 | 3.90493941  | 10.08691928 |
| Al | 7.76956672 | 3.89518959  | 10.04834915 |
| Al | 1.76933300 | 10.76299293 | 11.63798732 |
| Al | 5.75498331 | 10.76587413 | 11.64109498 |
| N  | 3.76097442 | 10.65845105 | 11.75386915 |
| N  | 7.74979598 | 10.65889477 | 11.75117896 |
| N  | 1.76916625 | 1.00276562  | 11.75118216 |
| N  | 5.75583692 | 0.99882645  | 11.75979860 |
| Al | 3.75711710 | 0.89234923  | 11.63540230 |
| Al | 7.75226190 | 0.89559017  | 11.63855941 |
| Al | 1.74500949 | 5.01611249  | 11.57139612 |
| Ga | 5.91524675 | 4.90818125  | 11.79412374 |
| N  | 3.59424394 | 4.86514690  | 11.75439445 |
| N  | 7.86450088 | 4.89805011  | 11.70693313 |
| N  | 1.76707644 | 6.94137404  | 11.75685562 |
| N  | 5.75639465 | 6.87150832  | 11.79946375 |
| Al | 3.75250485 | 6.75940590  | 11.65061492 |
| Al | 7.78188950 | 6.80967617  | 11.64314239 |
| Al | 1.77195924 | 1.94403913  | 0.00000000  |
| Al | 1.77195924 | 7.77596708  | 0.00000000  |
| Al | 3.76418840 | 3.88730831  | 0.00000000  |
| Al | 5.75641757 | 1.94383910  | 0.00000000  |
| Al | 5.75641757 | 7.77576706  | 0.00000000  |
| Al | 7.75033693 | 3.88718872  | 0.00000000  |
| N  | 1.77213916 | 3.88747871  | 0.00000000  |
| N  | 3.76478849 | 1.94379942  | 0.00000000  |

|    |            |             |            |
|----|------------|-------------|------------|
| N  | 3.76478849 | 7.77571678  | 0.00000000 |
| N  | 5.75646784 | 3.88735858  | 0.00000000 |
| N  | 7.75007710 | 1.94370946  | 0.00000000 |
| N  | 7.75007710 | 7.77563688  | 0.00000000 |
| N  | 1.77213916 | 9.71939608  | 0.00031010 |
| N  | 5.75646784 | 9.71927595  | 0.00031010 |
| Al | 3.76418840 | 9.71922621  | 0.00031010 |
| Al | 7.75033693 | 9.71911614  | 0.00031010 |
| Al | 1.77195924 | 4.85982822  | 1.68307920 |
| Al | 5.75641757 | 4.85962819  | 1.68307920 |
| N  | 7.75007710 | 4.85949801  | 1.68308925 |
| N  | 3.76478849 | 4.85958797  | 1.68308925 |
| N  | 1.77213916 | 6.80326726  | 1.68315910 |
| N  | 5.75646784 | 6.80314714  | 1.68315910 |
| Al | 7.75033693 | 6.80298733  | 1.68315910 |
| Al | 3.76419846 | 6.80309740  | 1.68315910 |
| Al | 1.77195924 | 10.69132595 | 1.68317921 |
| Al | 5.75641757 | 10.69112592 | 1.68317921 |
| N  | 3.76478849 | 10.69108570 | 1.68317921 |
| N  | 7.75007710 | 10.69099574 | 1.68317921 |
| N  | 1.77213916 | 0.97153987  | 1.68324959 |
| N  | 5.75646784 | 0.97141974  | 1.68324959 |
| Al | 3.76419846 | 0.97136947  | 1.68325912 |
| Al | 7.75033693 | 0.97125940  | 1.68325912 |
| Al | 1.77195924 | 7.77518708  | 3.36602875 |
| Al | 5.75641757 | 7.77498705  | 3.36602875 |
| N  | 3.76478849 | 7.77494683  | 3.36602875 |
| N  | 7.75007710 | 7.77485687  | 3.36602875 |
| N  | 1.77213916 | 9.71862612  | 3.36610866 |
| N  | 5.75646784 | 9.71850600  | 3.36610866 |
| Al | 3.76418840 | 9.71845626  | 3.36610866 |
| Al | 7.75033693 | 9.71833613  | 3.36610866 |
| Al | 1.77195924 | 1.94389943  | 3.36636848 |
| Al | 5.75641757 | 1.94369940  | 3.36636848 |
| N  | 3.76478849 | 1.94365918  | 3.36637854 |
| N  | 7.75007710 | 1.94356922  | 3.36637854 |
| N  | 1.77213916 | 3.88732842  | 3.36644892 |
| N  | 5.75646784 | 3.88720830  | 3.36644892 |
| Al | 3.76418840 | 3.88715856  | 3.36645844 |
| Al | 7.75033693 | 3.88704849  | 3.36645844 |
| Al | 1.77195924 | 10.69097563 | 5.04921802 |
| Al | 5.75641757 | 10.69077560 | 5.04922807 |
| N  | 7.75007710 | 10.69065601 | 5.04922807 |
| N  | 3.76478849 | 10.69073591 | 5.04922807 |
| N  | 1.77213916 | 0.97119961  | 5.04929792 |
| N  | 5.75646784 | 0.97107948  | 5.04930798 |

|    |            |            |             |
|----|------------|------------|-------------|
| Al | 7.75033693 | 0.97091967 | 5.04930798  |
| Al | 3.76419846 | 0.97102974 | 5.04930798  |
| Al | 1.77195924 | 4.85925829 | 5.04931803  |
| Al | 5.75641757 | 4.85905826 | 5.04931803  |
| N  | 3.76478849 | 4.85901805 | 5.04932809  |
| N  | 7.75007710 | 4.85892809 | 5.04932809  |
| N  | 1.77213916 | 6.80268728 | 5.04939794  |
| N  | 5.75646784 | 6.80256716 | 5.04939794  |
| Al | 3.76419846 | 6.80252747 | 5.04940799  |
| Al | 7.75033693 | 6.80240735 | 5.04940799  |
| C  | 5.31748633 | 3.92856789 | 13.73483400 |
| C  | 4.65399833 | 4.64300040 | 14.91945052 |
| C  | 4.83108273 | 3.88160050 | 16.23483753 |
| H  | 4.47305439 | 4.33926236 | 12.77151123 |
| H  | 6.41546277 | 3.96409822 | 13.85119615 |
| H  | 5.07952219 | 2.85424220 | 13.69187055 |
| H  | 5.06905251 | 5.66017336 | 15.00828135 |
| H  | 3.57864138 | 4.77424865 | 14.71244776 |
| H  | 4.37728572 | 2.88170119 | 16.16569313 |
| H  | 5.89564676 | 3.74356676 | 16.47283847 |
| H  | 4.35957153 | 4.40766075 | 17.07714670 |

**Table S13.** TS of second C-H activation on Ga/AlN through the stepwise SPI mechanism.

Total energy: -869.587 Hartree

|    |              |              |              |
|----|--------------|--------------|--------------|
| Al | 1.7686495406 | 1.9033978427 | 6.7296202766 |
| Al | 5.7539202585 | 1.9025720012 | 6.7310278962 |
| N  | 3.7614815891 | 1.9027690458 | 6.7362310992 |
| N  | 7.7479287368 | 1.9038709232 | 6.7354490574 |
| Al | 3.7662636731 | 3.8389013534 | 6.6959727949 |
| Al | 7.7404840647 | 3.8394136655 | 6.6945571363 |
| N  | 1.7692207149 | 3.8379581715 | 6.6813819795 |
| N  | 5.7523950397 | 3.8362901203 | 6.6967313968 |
| Al | 1.7732619637 | 7.7336661272 | 6.7359604438 |
| Al | 5.7504864900 | 7.7330585717 | 6.7369691051 |
| N  | 3.7617233477 | 7.7324328548 | 6.7451309141 |
| N  | 7.7487810166 | 7.7324154997 | 6.7362520423 |
| N  | 1.7692029337 | 9.6689203464 | 6.6960783020 |
| N  | 5.7557436752 | 9.6684967272 | 6.6963438258 |
| Al | 3.7630860449 | 9.6659071243 | 6.7044641519 |
| Al | 7.7472992319 | 9.6664769781 | 6.7035280959 |
| Al | 1.7619501815 | 4.7838571016 | 8.3426553318 |
| Al | 5.7503675376 | 4.7925370291 | 8.3843026091 |
| N  | 7.7308332455 | 4.7835458183 | 8.3720131363 |
| N  | 3.7676715574 | 4.7758253660 | 8.3839333147 |
| N  | 1.7752515941 | 6.7156284717 | 8.3858736786 |
| N  | 5.7442128651 | 6.7215321481 | 8.3869989297 |

|    |              |               |               |
|----|--------------|---------------|---------------|
| Al | 7.7422571624 | 6.7219284266  | 8.3802574778  |
| Al | 3.7620670700 | 6.7148701067  | 8.4129401868  |
| Al | 1.7704030711 | 10.5955447154 | 8.3853736881  |
| Al | 5.7506816629 | 10.5938047878 | 8.3895438179  |
| N  | 3.7635482998 | 10.5836144942 | 8.4020192567  |
| N  | 7.7444518519 | 10.5913421447 | 8.3972237980  |
| N  | 1.7677462556 | 0.8660933281  | 8.3652357599  |
| N  | 5.7519749771 | 0.8725241889  | 8.3728073516  |
| Al | 3.7609213663 | 0.8551536875  | 8.3618946923  |
| Al | 7.7437145711 | 0.8593017582  | 8.3625299030  |
| Al | 1.7849600046 | 7.6563786875  | 10.1093683193 |
| Al | 5.7356349444 | 7.6299515108  | 10.1140835698 |
| N  | 3.7659368458 | 7.6101786187  | 10.1549737006 |
| N  | 7.7420586381 | 7.6674471248  | 10.0377168927 |
| N  | 1.7732995448 | 9.5939952511  | 10.0388581340 |
| N  | 5.7476399537 | 9.5861082338  | 10.0507236122 |
| Al | 3.7635136984 | 9.5619159330  | 10.0904879459 |
| Al | 7.7422984386 | 9.5791846322  | 10.0671548090 |
| Al | 1.7597150087 | 1.8168884769  | 10.0570789196 |
| Al | 5.7514845630 | 1.8143818779  | 10.0816011327 |
| N  | 3.7571795674 | 1.8017958947  | 10.0462063537 |
| N  | 7.7409886546 | 1.8081339838  | 10.0443613026 |
| N  | 1.7591770445 | 3.7365995753  | 9.9335891490  |
| N  | 5.7345117627 | 3.7504090545  | 10.0590171320 |
| Al | 3.7530782903 | 3.7228422453  | 9.9972301019  |
| Al | 7.7395130543 | 3.7423732567  | 10.0175350989 |
| Al | 1.7629689153 | 10.6137076510 | 11.6535098878 |
| Al | 5.7537951699 | 10.6148094657 | 11.6599225443 |
| N  | 3.7578811055 | 10.5047203902 | 11.7824095815 |
| N  | 7.7463042652 | 10.5150233463 | 11.7688231370 |
| N  | 1.7675028997 | 0.8614188182  | 11.7476348793 |
| N  | 5.7480633667 | 0.8587267347  | 11.7649568659 |
| Al | 3.7524761004 | 0.7296488904  | 11.6243071148 |
| Al | 7.7478499826 | 0.7496335901  | 11.6343593588 |
| Al | 1.6861438534 | 4.8750312499  | 11.4825657555 |
| Ga | 5.8738140054 | 4.7628579877  | 11.8166089742 |
| N  | 3.5646439750 | 4.6522765217  | 11.6837675183 |
| N  | 7.8414499337 | 4.6803055730  | 11.6818420690 |
| N  | 1.7165074789 | 6.7451368607  | 11.7686006414 |
| N  | 5.8215493613 | 6.7043763693  | 11.7908668429 |
| Al | 3.7493639005 | 6.6405325383  | 11.9626870191 |
| Al | 7.7600721531 | 6.6210899161  | 11.6339277070 |
| Al | 1.7719592389 | 1.9440391324  | 0.0000000000  |
| Al | 1.7719592389 | 7.7759670844  | 0.0000000000  |
| Al | 3.7641884040 | 3.8873083123  | 0.0000000000  |
| Al | 5.7564175691 | 1.9438391035  | 0.0000000000  |

|    |              |               |              |
|----|--------------|---------------|--------------|
| Al | 5.7564175691 | 7.7757670555  | 0.0000000000 |
| Al | 7.7503369255 | 3.8871887183  | 0.0000000000 |
| N  | 1.7721391590 | 3.8874787073  | 0.0000000000 |
| N  | 3.7647884907 | 1.9437994152  | 0.0000000000 |
| N  | 3.7647884907 | 7.7757167836  | 0.0000000000 |
| N  | 5.7564678409 | 3.8873585841  | 0.0000000000 |
| N  | 7.7500770996 | 1.9437094552  | 0.0000000000 |
| N  | 7.7500770996 | 7.7756368779  | 0.0000000000 |
| N  | 1.7721391590 | 9.7193960757  | 0.0003100977 |
| N  | 5.7564678409 | 9.7192759525  | 0.0003100977 |
| Al | 3.7641884040 | 9.7192262099  | 0.0003100977 |
| Al | 7.7503369255 | 9.7191161411  | 0.0003100977 |
| Al | 1.7719592389 | 4.8598282154  | 1.6830791991 |
| Al | 5.7564175691 | 4.8596281865  | 1.6830791991 |
| N  | 7.7500770996 | 4.8594980089  | 1.6830892535 |
| N  | 3.7647884907 | 4.8595879690  | 1.6830892535 |
| N  | 1.7721391590 | 6.8032672611  | 1.6831591048 |
| N  | 5.7564678409 | 6.8031471379  | 1.6831591048 |
| Al | 7.7503369255 | 6.8029873265  | 1.6831591048 |
| Al | 3.7641984583 | 6.8030973953  | 1.6831591048 |
| Al | 1.7719592389 | 10.6913259464 | 1.6831792136 |
| Al | 5.7564175691 | 10.6911259175 | 1.6831792136 |
| N  | 3.7647884907 | 10.6910857001 | 1.6831792136 |
| N  | 7.7500770996 | 10.6909957400 | 1.6831792136 |
| N  | 1.7721391590 | 0.9715398673  | 1.6832495941 |
| N  | 5.7564678409 | 0.9714197441  | 1.6832495941 |
| Al | 3.7641984583 | 0.9713694723  | 1.6832591193 |
| Al | 7.7503369255 | 0.9712594035  | 1.6832591193 |
| Al | 1.7719592389 | 7.7751870775  | 3.3660287499 |
| Al | 5.7564175691 | 7.7749870486  | 3.3660287499 |
| N  | 3.7647884907 | 7.7749468311  | 3.3660287499 |
| N  | 7.7500770996 | 7.7748568710  | 3.3660287499 |
| N  | 1.7721391590 | 9.7186261232  | 3.3661086556 |
| N  | 5.7564678409 | 9.7185060000  | 3.3661086556 |
| Al | 3.7641884040 | 9.7184562574  | 3.3661086556 |
| Al | 7.7503369255 | 9.7183361342  | 3.3661086556 |
| Al | 1.7719592389 | 1.9438994297  | 3.3663684815 |
| Al | 5.7564175691 | 1.9436994008  | 3.3663684815 |
| N  | 3.7647884907 | 1.9436591833  | 3.3663785359 |
| N  | 7.7500770996 | 1.9435692233  | 3.3663785359 |
| N  | 1.7721391590 | 3.8873284211  | 3.3664489164 |
| N  | 5.7564678409 | 3.8872082979  | 3.3664489164 |
| Al | 3.7641884040 | 3.8871585552  | 3.3664584416 |
| Al | 7.7503369255 | 3.8870484864  | 3.3664584416 |
| Al | 1.7719592389 | 10.6909756312 | 5.0492180178 |
| Al | 5.7564175691 | 10.6907756023 | 5.0492280722 |

|    |              |               |               |
|----|--------------|---------------|---------------|
| N  | 7.7500770996 | 10.6906560083 | 5.0492280722  |
| N  | 3.7647884907 | 10.6907359141 | 5.0492280722  |
| N  | 1.7721391590 | 0.9711996065  | 5.0492979235  |
| N  | 5.7564678409 | 0.9710794833  | 5.0493079779  |
| Al | 7.7503369255 | 0.9709196718  | 5.0493079779  |
| Al | 3.7641984583 | 0.9710297406  | 5.0493079779  |
| Al | 1.7719592389 | 4.8592582918  | 5.0493180323  |
| Al | 5.7564175691 | 4.8590582629  | 5.0493180323  |
| N  | 3.7647884907 | 4.8590180454  | 5.0493280866  |
| N  | 7.7500770996 | 4.8589280853  | 5.0493280866  |
| N  | 1.7721391590 | 6.8026872831  | 5.0493979380  |
| N  | 5.7564678409 | 6.8025671599  | 5.0493979380  |
| Al | 3.7641984583 | 6.8025274717  | 5.0494079924  |
| Al | 7.7503369255 | 6.8024073485  | 5.0494079924  |
| C  | 5.6110772593 | 3.9732290177  | 13.8860459853 |
| C  | 4.6620108665 | 4.6745352898  | 14.6374209907 |
| C  | 3.3382925344 | 4.0704299827  | 14.9964049902 |
| H  | 3.7068841253 | 4.0908613722  | 12.5235594006 |
| H  | 3.9242647549 | 6.3210491378  | 13.6540896764 |
| H  | 5.3861199422 | 2.9343947948  | 13.6035177545 |
| H  | 6.6672852408 | 4.1701313135  | 14.0788761348 |
| H  | 4.9951182779 | 5.5116952814  | 15.2478359976 |
| H  | 2.9815024762 | 3.3411335254  | 14.2515806666 |
| H  | 2.5562560039 | 4.8185579214  | 15.1666408288 |
| H  | 3.4696513865 | 3.4948863907  | 15.9312104065 |

**Table S14.** TS of H<sub>2</sub> production on Ga/AlN through the stepwise PSD mechanism.

Total energy: -869.572 Hartree

|    |              |              |              |
|----|--------------|--------------|--------------|
| Al | 1.7765268084 | 1.9606839510 | 6.7150152247 |
| Al | 5.7617435917 | 1.9602713125 | 6.7162043112 |
| N  | 3.7689644366 | 1.9592263093 | 6.7133966876 |
| N  | 7.7552074699 | 1.9599583421 | 6.7116350083 |
| Al | 3.7736258675 | 3.8940439066 | 6.7230672523 |
| Al | 7.7506810914 | 3.8939071364 | 6.7212610109 |
| N  | 1.7775387648 | 3.8942219315 | 6.7177256350 |
| N  | 5.7607668168 | 3.8932594104 | 6.7260662856 |
| Al | 1.7757779462 | 7.7895684242 | 6.7116779887 |
| Al | 5.7623409206 | 7.7888289700 | 6.7120918855 |
| N  | 3.7684437097 | 7.7909660440 | 6.7089416722 |
| N  | 7.7555456332 | 7.7908716314 | 6.7080202367 |
| N  | 1.7759602405 | 9.7240630128 | 6.7185384041 |
| N  | 5.7619304715 | 9.7232108253 | 6.7182122246 |
| Al | 3.7695958564 | 9.7245582887 | 6.7179852304 |
| Al | 7.7543912101 | 9.7246724510 | 6.7175208267 |
| Al | 1.7818331890 | 4.8796766548 | 8.3717333642 |
| Al | 5.7645927823 | 4.8855032937 | 8.4007034438 |

|    |              |               |               |
|----|--------------|---------------|---------------|
| N  | 7.7516376360 | 4.8765464372  | 8.3825480895  |
| N  | 3.7809344878 | 4.8799905960  | 8.3905274186  |
| N  | 1.7791042276 | 6.8183005627  | 8.3826763312  |
| N  | 5.7667751245 | 6.8208079063  | 8.3824869831  |
| Al | 7.7563016793 | 6.8123180382  | 8.3703443041  |
| Al | 3.7757401883 | 6.8130343992  | 8.3699219727  |
| Al | 1.7798478096 | 10.7294460399 | 8.3659755649  |
| Al | 5.7657731330 | 10.7276641739 | 8.3683404630  |
| N  | 3.7745140602 | 10.7212441292 | 8.3740614977  |
| N  | 7.7570613536 | 10.7221612278 | 8.3737866241  |
| N  | 1.7795952122 | 0.9989143043  | 8.3913066464  |
| N  | 5.7662760408 | 1.0014192606  | 8.3962501195  |
| Al | 3.7740659676 | 0.9927705726  | 8.3833940922  |
| Al | 7.7579246552 | 0.9950389114  | 8.3827499905  |
| Al | 1.7844044208 | 7.8291512650  | 10.0538209887 |
| Al | 5.7681215938 | 7.8093255530  | 10.0602159616 |
| N  | 3.7821583822 | 7.8137807883  | 10.0203737310 |
| N  | 7.7557187192 | 7.8210689167  | 10.0186850099 |
| N  | 1.7841175837 | 9.7569466836  | 10.0298175286 |
| N  | 5.7673355388 | 9.7519900369  | 10.0376435839 |
| Al | 3.7788636545 | 9.7483168533  | 10.0608345457 |
| Al | 7.7589018368 | 9.7493215740  | 10.0590936683 |
| Al | 1.7832337572 | 1.9846128008  | 10.0783805628 |
| Al | 5.7699747976 | 1.9816766565  | 10.0932483236 |
| N  | 3.7762013000 | 1.9677674509  | 10.0589591079 |
| N  | 7.7627079971 | 1.9785341733  | 10.0556736229 |
| N  | 1.7956979931 | 3.9094168364  | 10.0205700451 |
| N  | 5.7599448703 | 3.9119127741  | 10.0972643881 |
| Al | 3.7851846222 | 3.9078831726  | 10.0882500373 |
| Al | 7.7556854365 | 3.9252577701  | 10.0802418904 |
| Al | 1.7837324494 | 10.7866307795 | 11.6390975964 |
| Al | 5.7712042991 | 10.7874453049 | 11.6430139942 |
| N  | 3.7764483573 | 10.6797945624 | 11.7574658819 |
| N  | 7.7639097876 | 10.6822276170 | 11.7532992964 |
| N  | 1.7838099502 | 1.0262686329  | 11.7674402443 |
| N  | 5.7712463997 | 1.0253360533  | 11.7797303006 |
| Al | 3.7740651880 | 0.9155104126  | 11.6498727471 |
| Al | 7.7677190857 | 0.9190323249  | 11.6467581638 |
| Al | 1.7582130448 | 5.0345477804  | 11.5810794899 |
| Ga | 5.8030370787 | 4.8990650840  | 11.9138476947 |
| N  | 3.6685067385 | 4.8935793356  | 11.7765799885 |
| N  | 7.8595016864 | 4.9179629397  | 11.7070030552 |
| N  | 1.7926645198 | 6.9452576761  | 11.7529055624 |
| N  | 5.7638733735 | 6.9129886635  | 11.7908200247 |
| Al | 3.7815729631 | 6.8115479722  | 11.6426878267 |
| Al | 7.7622043203 | 6.8033097487  | 11.6255490082 |

|    |              |               |              |
|----|--------------|---------------|--------------|
| Al | 1.7719587097 | 1.9440386033  | 0.0000000000 |
| Al | 1.7719587097 | 7.7759639093  | 0.0000000000 |
| Al | 3.7641868164 | 3.8873067248  | 0.0000000000 |
| Al | 5.7564154524 | 1.9438385743  | 0.0000000000 |
| Al | 5.7564154524 | 7.7757638804  | 0.0000000000 |
| Al | 7.7503337505 | 3.8871871308  | 0.0000000000 |
| N  | 1.7721386299 | 3.8874771198  | 0.0000000000 |
| N  | 3.7647869032 | 1.9437988861  | 0.0000000000 |
| N  | 3.7647869032 | 7.7757136086  | 0.0000000000 |
| N  | 5.7564657242 | 3.8873569966  | 0.0000000000 |
| N  | 7.7500739246 | 1.9437089260  | 0.0000000000 |
| N  | 7.7500739246 | 7.7756337028  | 0.0000000000 |
| N  | 1.7721386299 | 9.7193923715  | 0.0003100977 |
| N  | 5.7564657242 | 9.7192722483  | 0.0003100977 |
| Al | 3.7641868164 | 9.7192225057  | 0.0003100977 |
| Al | 7.7503337505 | 9.7191124368  | 0.0003100977 |
| Al | 1.7719587097 | 4.8598260987  | 1.6830786699 |
| Al | 5.7564154524 | 4.8596260698  | 1.6830786699 |
| N  | 7.7500739246 | 4.8594958922  | 1.6830887243 |
| N  | 3.7647869032 | 4.8595858523  | 1.6830887243 |
| N  | 1.7721386299 | 6.8032646152  | 1.6831585757 |
| N  | 5.7564657242 | 6.8031444920  | 1.6831585757 |
| Al | 7.7503337505 | 6.8029846806  | 1.6831585757 |
| Al | 3.7641968708 | 6.8030947494  | 1.6831585757 |
| Al | 1.7719587097 | 10.6913217130 | 1.6831786844 |
| Al | 5.7564154524 | 10.6911216841 | 1.6831786844 |
| N  | 3.7647869032 | 10.6910814666 | 1.6831786844 |
| N  | 7.7500739246 | 10.6909915066 | 1.6831786844 |
| N  | 1.7721386299 | 0.9715393381  | 1.6832490649 |
| N  | 5.7564657242 | 0.9714192149  | 1.6832490649 |
| Al | 3.7641968708 | 0.9713689431  | 1.6832585901 |
| Al | 7.7503337505 | 0.9712588743  | 1.6832585901 |
| Al | 1.7719587097 | 7.7751839024  | 3.3660271623 |
| Al | 5.7564154524 | 7.7749838735  | 3.3660271623 |
| N  | 3.7647869032 | 7.7749436560  | 3.3660271623 |
| N  | 7.7500739246 | 7.7748536960  | 3.3660271623 |
| N  | 1.7721386299 | 9.7186224189  | 3.3661075972 |
| N  | 5.7564657242 | 9.7185022958  | 3.3661075972 |
| Al | 3.7641868164 | 9.7184525531  | 3.3661075972 |
| Al | 7.7503337505 | 9.7183324299  | 3.3661075972 |
| Al | 1.7719587097 | 1.9438989005  | 3.3663668940 |
| Al | 5.7564154524 | 1.9436988716  | 3.3663668940 |
| N  | 3.7647869032 | 1.9436586542  | 3.3663774775 |
| N  | 7.7500739246 | 1.9435686941  | 3.3663774775 |
| N  | 1.7721386299 | 3.8873268335  | 3.3664473289 |
| N  | 5.7564657242 | 3.8872067103  | 3.3664473289 |



|    |              |               |               |
|----|--------------|---------------|---------------|
| Al | 3.7641868164 | 3.8871569677  | 3.3664568541  |
| Al | 7.7503337505 | 3.8870468989  | 3.3664568541  |
| Al | 1.7719587097 | 10.6909713978 | 5.0492159011  |
| Al | 5.7564154524 | 10.6907713689 | 5.0492259555  |
| N  | 7.7500739246 | 10.6906517749 | 5.0492259555  |
| N  | 3.7647869032 | 10.6907316807 | 5.0492259555  |
| N  | 1.7721386299 | 0.9711990773  | 5.0492958068  |
| N  | 5.7564657242 | 0.9710789541  | 5.0493058612  |
| Al | 7.7503337505 | 0.9709191426  | 5.0493058612  |
| Al | 3.7641968708 | 0.9710292115  | 5.0493058612  |
| Al | 1.7719587097 | 4.8592561751  | 5.0493159156  |
| Al | 5.7564154524 | 4.8590561462  | 5.0493159156  |
| N  | 3.7647869032 | 4.8590159287  | 5.0493259699  |
| N  | 7.7500739246 | 4.8589259686  | 5.0493259699  |
| N  | 1.7721386299 | 6.8026846372  | 5.0493958213  |
| N  | 5.7564657242 | 6.8025645141  | 5.0493958213  |
| Al | 3.7641968708 | 6.8025248258  | 5.0494058756  |
| Al | 7.7503337505 | 6.8024047026  | 5.0494058756  |
| C  | 6.1304957112 | 4.3377909525  | 14.1077303276 |
| C  | 5.0697772493 | 4.3670170378  | 15.0134526859 |
| C  | 4.6118753751 | 3.1526319969  | 15.7672355746 |
| H  | 3.4865301274 | 4.5986344949  | 13.3627270414 |
| H  | 3.5812488556 | 4.5190332946  | 14.2094177829 |
| H  | 6.7980791181 | 5.2010846829  | 14.1043384836 |
| H  | 6.6093664966 | 3.3745439274  | 13.9104218287 |
| H  | 4.8352300417 | 5.3329934854  | 15.4716919834 |
| H  | 5.2494587404 | 3.0438097166  | 16.6615445864 |
| H  | 4.7281755606 | 2.2416904262  | 15.1658080713 |
| H  | 3.5720016430 | 3.2314357715  | 16.1091819169 |

**Table S15.** TS of H<sub>2</sub> production on Ga/AlN through the stepwise PSI/SP mechanism.

Total energy: -848.941 Hartree

|    |            |            |            |
|----|------------|------------|------------|
| Al | 1.77109847 | 1.94121852 | 6.71336666 |
| Al | 5.75565999 | 1.94110280 | 6.71378697 |
| N  | 3.76364431 | 1.94396955 | 6.71428008 |
| N  | 7.74940171 | 1.94473973 | 6.71269203 |
| Al | 3.76362390 | 3.87433547 | 6.70967399 |
| Al | 7.74894622 | 3.87391852 | 6.70726032 |
| N  | 1.77140100 | 3.87242324 | 6.70519166 |
| N  | 5.75549090 | 3.87252137 | 6.70620304 |
| Al | 1.77338746 | 7.77172417 | 6.71411017 |
| Al | 5.75353066 | 7.77140600 | 6.71463644 |
| N  | 3.76388514 | 7.77303104 | 6.72069438 |
| N  | 7.74930565 | 7.77189204 | 6.71226398 |
| N  | 1.77030504 | 9.70162964 | 6.70364783 |
| N  | 5.75693342 | 9.70151465 | 6.70420535 |

|    |            |             |             |
|----|------------|-------------|-------------|
| Al | 3.76361120 | 9.70281420  | 6.70824346  |
| Al | 7.74930505 | 9.70282177  | 6.70748663  |
| Al | 1.77389921 | 4.85510524  | 8.36036628  |
| Al | 5.75093600 | 4.85653775  | 8.36164880  |
| N  | 7.74829007 | 4.84569165  | 8.37523334  |
| N  | 3.76279311 | 4.84649092  | 8.38344306  |
| N  | 1.77506100 | 6.78460260  | 8.37065588  |
| N  | 5.75095795 | 6.78379790  | 8.37318866  |
| Al | 7.74887547 | 6.78513127  | 8.36511051  |
| Al | 3.76261446 | 6.78259806  | 8.38760236  |
| Al | 1.77071229 | 10.67877348 | 8.36542336  |
| Al | 5.75494655 | 10.67857935 | 8.36575762  |
| N  | 3.76307386 | 10.67232373 | 8.37400255  |
| N  | 7.74903790 | 10.67698292 | 8.37151538  |
| N  | 1.77040994 | 0.95001556  | 8.36920497  |
| N  | 5.75549589 | 0.94942387  | 8.37000913  |
| Al | 3.76220960 | 0.94074940  | 8.36186992  |
| Al | 7.74922117 | 0.94309322  | 8.36011211  |
| Al | 1.77351352 | 7.75659713  | 10.05730717 |
| Al | 5.75132174 | 7.75601632  | 10.05936590 |
| N  | 3.76497134 | 7.74828395  | 10.08072347 |
| N  | 7.74708218 | 7.77050274  | 10.00718702 |
| N  | 1.77262584 | 9.69455314  | 10.02369529 |
| N  | 5.75284374 | 9.69526416  | 10.02488587 |
| Al | 3.76283388 | 9.68702629  | 10.06247510 |
| Al | 7.74800897 | 9.68989235  | 10.05074214 |
| Al | 1.77071806 | 1.91639246  | 10.05960932 |
| Al | 5.75293587 | 1.91014421  | 10.06091469 |
| N  | 3.76031882 | 1.91007995  | 10.03450533 |
| N  | 7.74986314 | 1.92100931  | 10.02725440 |
| N  | 1.78533581 | 3.85885822  | 10.01557795 |
| N  | 5.73649355 | 3.84342306  | 10.00860061 |
| Al | 3.75926267 | 3.83932939  | 10.05522585 |
| Al | 7.75035793 | 3.84562632  | 10.03863189 |
| Al | 1.76646721 | 10.73196776 | 11.63171876 |
| Al | 5.75735527 | 10.73086394 | 11.63327571 |
| N  | 3.76179720 | 10.62666009 | 11.75054773 |
| N  | 7.74866275 | 10.63124151 | 11.73684723 |
| N  | 1.76796514 | 0.96964318  | 11.73877569 |
| N  | 5.75616511 | 0.96780659  | 11.73906887 |
| Al | 3.76066340 | 0.86159071  | 11.63653394 |
| Al | 7.74881649 | 0.86681964  | 11.63130118 |
| Al | 1.73429198 | 4.92956139  | 11.59488552 |
| Ga | 5.79474251 | 4.91135846  | 11.67283867 |
| N  | 3.70166666 | 4.78261189  | 11.83279708 |
| N  | 7.79301110 | 4.79659849  | 11.71608111 |

|    |            |             |             |
|----|------------|-------------|-------------|
| N  | 1.73262769 | 6.81920200  | 11.71341123 |
| N  | 5.79761507 | 6.85592201  | 11.74855354 |
| Al | 3.74771228 | 6.83171249  | 11.81139934 |
| Al | 7.75871615 | 6.73096627  | 11.61440591 |
| Al | 1.77196000 | 1.94404000  | 0.00000000  |
| Al | 1.77196000 | 7.77597000  | 0.00000000  |
| Al | 3.76419000 | 3.88731000  | 0.00000000  |
| Al | 5.75642000 | 1.94384000  | 0.00000000  |
| Al | 5.75642000 | 7.77577000  | 0.00000000  |
| Al | 7.75034000 | 3.88719000  | 0.00000000  |
| N  | 1.77214000 | 3.88748000  | 0.00000000  |
| N  | 3.76479000 | 1.94380000  | 0.00000000  |
| N  | 3.76479000 | 7.77572000  | 0.00000000  |
| N  | 5.75647000 | 3.88736000  | 0.00000000  |
| N  | 7.75008000 | 1.94371000  | 0.00000000  |
| N  | 7.75008000 | 7.77564000  | 0.00000000  |
| N  | 1.77214000 | 9.71940000  | 0.00031000  |
| N  | 5.75647000 | 9.71928000  | 0.00031000  |
| Al | 3.76419000 | 9.71923000  | 0.00031000  |
| Al | 7.75034000 | 9.71912000  | 0.00031000  |
| Al | 1.77196000 | 4.85983000  | 1.68308000  |
| Al | 5.75642000 | 4.85963000  | 1.68308000  |
| N  | 7.75008000 | 4.85950000  | 1.68309000  |
| N  | 3.76479000 | 4.85959000  | 1.68309000  |
| N  | 1.77214000 | 6.80327000  | 1.68316000  |
| N  | 5.75647000 | 6.80315000  | 1.68316000  |
| Al | 7.75034000 | 6.80299000  | 1.68316000  |
| Al | 3.76420000 | 6.80310000  | 1.68316000  |
| Al | 1.77196000 | 10.69133000 | 1.68318000  |
| Al | 5.75642000 | 10.69113000 | 1.68318000  |
| N  | 3.76479000 | 10.69109000 | 1.68318000  |
| N  | 7.75008000 | 10.69100000 | 1.68318000  |
| N  | 1.77214000 | 0.97154000  | 1.68325000  |
| N  | 5.75647000 | 0.97142000  | 1.68325000  |
| Al | 3.76420000 | 0.97137000  | 1.68326000  |
| Al | 7.75034000 | 0.97126000  | 1.68326000  |
| Al | 1.77196000 | 7.77519000  | 3.36603000  |
| Al | 5.75642000 | 7.77499000  | 3.36603000  |
| N  | 3.76479000 | 7.77495000  | 3.36603000  |
| N  | 7.75008000 | 7.77486000  | 3.36603000  |
| N  | 1.77214000 | 9.71863000  | 3.36611000  |
| N  | 5.75647000 | 9.71851000  | 3.36611000  |
| Al | 3.76419000 | 9.71846000  | 3.36611000  |
| Al | 7.75034000 | 9.71834000  | 3.36611000  |
| Al | 1.77196000 | 1.94390000  | 3.36637000  |
| Al | 5.75642000 | 1.94370000  | 3.36637000  |

|    |            |             |             |
|----|------------|-------------|-------------|
| N  | 3.76479000 | 1.94366000  | 3.36638000  |
| N  | 7.75008000 | 1.94357000  | 3.36638000  |
| N  | 1.77214000 | 3.88733000  | 3.36645000  |
| N  | 5.75647000 | 3.88721000  | 3.36645000  |
| Al | 3.76419000 | 3.88716000  | 3.36646000  |
| Al | 7.75034000 | 3.88705000  | 3.36646000  |
| Al | 1.77196000 | 10.69098000 | 5.04922000  |
| Al | 5.75642000 | 10.69078000 | 5.04923000  |
| N  | 7.75008000 | 10.69066000 | 5.04923000  |
| N  | 3.76479000 | 10.69074000 | 5.04923000  |
| N  | 1.77214000 | 0.97120000  | 5.04930000  |
| N  | 5.75647000 | 0.97108000  | 5.04931000  |
| Al | 7.75034000 | 0.97092000  | 5.04931000  |
| Al | 3.76420000 | 0.97103000  | 5.04931000  |
| Al | 1.77196000 | 4.85926000  | 5.04932000  |
| Al | 5.75642000 | 4.85906000  | 5.04932000  |
| N  | 3.76479000 | 4.85902000  | 5.04933000  |
| N  | 7.75008000 | 4.85893000  | 5.04933000  |
| N  | 1.77214000 | 6.80269000  | 5.04940000  |
| N  | 5.75647000 | 6.80257000  | 5.04940000  |
| Al | 3.76420000 | 6.80253000  | 5.04941000  |
| Al | 7.75034000 | 6.80241000  | 5.04941000  |
| H  | 3.75293248 | 6.38016024  | 13.52457447 |
| H  | 3.72661249 | 5.42107207  | 12.96814164 |

**Table S16.** TS of first C-H activation on Ga/AlN through the stepwise SP mechanism.

Total energy: -869.617 Hartree

|    |            |            |            |
|----|------------|------------|------------|
| Al | 1.76872544 | 1.93563021 | 6.71711980 |
| Al | 5.75305273 | 1.93475629 | 6.71805622 |
| N  | 3.76099197 | 1.93594595 | 6.71873419 |
| N  | 7.74762032 | 1.93618095 | 6.71760349 |
| Al | 3.76430213 | 3.86686751 | 6.71056530 |
| Al | 7.74190895 | 3.86711134 | 6.70769693 |
| N  | 1.76863747 | 3.86755777 | 6.69991548 |
| N  | 5.75243986 | 3.86593910 | 6.71275845 |
| Al | 1.76786080 | 7.76446615 | 6.71857842 |
| Al | 5.75346595 | 7.76360925 | 6.71940165 |
| N  | 3.76078986 | 7.76488757 | 6.72085366 |
| N  | 7.74735199 | 7.76505317 | 6.71957806 |
| N  | 1.76861974 | 9.69655633 | 6.70382774 |
| N  | 5.75453378 | 9.69569709 | 6.70385101 |
| Al | 3.76208753 | 9.69764642 | 6.70774002 |
| Al | 7.74627997 | 9.69761258 | 6.70741180 |
| Al | 1.76437621 | 4.82635882 | 8.36352222 |
| Al | 5.74715401 | 4.83412227 | 8.39295619 |
| N  | 7.73300017 | 4.82532269 | 8.37910191 |

|    |            |             |             |
|----|------------|-------------|-------------|
| N  | 3.76449973 | 4.82382412  | 8.38977193  |
| N  | 1.76459029 | 6.76495566  | 8.37415882  |
| N  | 5.75003846 | 6.76590002  | 8.37397389  |
| Al | 7.74045459 | 6.75842399  | 8.36465309  |
| Al | 3.75884026 | 6.75753180  | 8.36640453  |
| Al | 1.76705640 | 10.67195951 | 8.36535681  |
| Al | 5.75075209 | 10.66933619 | 8.36903448  |
| N  | 3.76217738 | 10.66297280 | 8.37818975  |
| N  | 7.74279336 | 10.66375466 | 8.37760479  |
| N  | 1.76743928 | 0.93930109  | 8.37064726  |
| N  | 5.75121240 | 0.94404991  | 8.37490650  |
| Al | 3.75965242 | 0.93658575  | 8.36985816  |
| Al | 7.74362254 | 0.93552863  | 8.36666759  |
| Al | 1.76203097 | 7.75146491  | 10.05667361 |
| Al | 5.74523281 | 7.72267440  | 10.06430271 |
| N  | 3.76220963 | 7.72549854  | 10.03425478 |
| N  | 7.73108800 | 7.73627319  | 10.02431562 |
| N  | 1.76658790 | 9.67426466  | 10.01308588 |
| N  | 5.74781676 | 9.66196588  | 10.02328792 |
| Al | 3.75916437 | 9.66368438  | 10.05362737 |
| Al | 7.73954474 | 9.66494716  | 10.04954262 |
| Al | 1.76284617 | 1.90498976  | 10.06188888 |
| Al | 5.74862570 | 1.90006585  | 10.07785884 |
| N  | 3.75720586 | 1.90099928  | 10.05024410 |
| N  | 7.74142399 | 1.89924654  | 10.03960684 |
| N  | 1.75323066 | 3.82821130  | 9.99242492  |
| N  | 5.74211426 | 3.83931733  | 10.08632210 |
| Al | 3.74458170 | 3.84379874  | 10.07994343 |
| Al | 7.75102395 | 3.83489578  | 10.05188684 |
| Al | 1.76276563 | 10.68904147 | 11.63438538 |
| Al | 5.75021919 | 10.68786101 | 11.63323778 |
| N  | 3.75607396 | 10.58466920 | 11.75367694 |
| N  | 7.74553594 | 10.57788927 | 11.74948367 |
| N  | 1.76084116 | 0.92608114  | 11.72925107 |
| N  | 5.75734688 | 0.91366141  | 11.72508172 |
| Al | 3.74988139 | 0.82034797  | 11.62542371 |
| Al | 7.74571701 | 0.81539965  | 11.61544720 |
| Al | 1.72256477 | 4.94498887  | 11.57524644 |
| Ga | 5.87448603 | 4.83356801  | 11.82467827 |
| N  | 3.57516905 | 4.80543540  | 11.74176311 |
| N  | 7.83671292 | 4.81854868  | 11.72594412 |
| N  | 1.74878217 | 6.86676971  | 11.75224979 |
| N  | 5.74110489 | 6.80054782  | 11.79405631 |
| Al | 3.73494840 | 6.69885753  | 11.64354961 |
| Al | 7.76001357 | 6.73414783  | 11.64186242 |
| Al | 1.77195924 | 1.94403913  | 0.00000000  |

|    |            |             |            |
|----|------------|-------------|------------|
| Al | 1.77195924 | 7.77596708  | 0.00000000 |
| Al | 3.76418840 | 3.88730831  | 0.00000000 |
| Al | 5.75641757 | 1.94383910  | 0.00000000 |
| Al | 5.75641757 | 7.77576706  | 0.00000000 |
| Al | 7.75033693 | 3.88718872  | 0.00000000 |
| N  | 1.77213916 | 3.88747871  | 0.00000000 |
| N  | 3.76478849 | 1.94379942  | 0.00000000 |
| N  | 3.76478849 | 7.77571678  | 0.00000000 |
| N  | 5.75646784 | 3.88735858  | 0.00000000 |
| N  | 7.75007710 | 1.94370946  | 0.00000000 |
| N  | 7.75007710 | 7.77563688  | 0.00000000 |
| N  | 1.77213916 | 9.71939608  | 0.00031010 |
| N  | 5.75646784 | 9.71927595  | 0.00031010 |
| Al | 3.76418840 | 9.71922621  | 0.00031010 |
| Al | 7.75033693 | 9.71911614  | 0.00031010 |
| Al | 1.77195924 | 4.85982822  | 1.68307920 |
| Al | 5.75641757 | 4.85962819  | 1.68307920 |
| N  | 7.75007710 | 4.85949801  | 1.68308925 |
| N  | 3.76478849 | 4.85958797  | 1.68308925 |
| N  | 1.77213916 | 6.80326726  | 1.68315910 |
| N  | 5.75646784 | 6.80314714  | 1.68315910 |
| Al | 7.75033693 | 6.80298733  | 1.68315910 |
| Al | 3.76419846 | 6.80309740  | 1.68315910 |
| Al | 1.77195924 | 10.69132595 | 1.68317921 |
| Al | 5.75641757 | 10.69112592 | 1.68317921 |
| N  | 3.76478849 | 10.69108570 | 1.68317921 |
| N  | 7.75007710 | 10.69099574 | 1.68317921 |
| N  | 1.77213916 | 0.97153987  | 1.68324959 |
| N  | 5.75646784 | 0.97141974  | 1.68324959 |
| Al | 3.76419846 | 0.97136947  | 1.68325912 |
| Al | 7.75033693 | 0.97125940  | 1.68325912 |
| Al | 1.77195924 | 7.77518708  | 3.36602875 |
| Al | 5.75641757 | 7.77498705  | 3.36602875 |
| N  | 3.76478849 | 7.77494683  | 3.36602875 |
| N  | 7.75007710 | 7.77485687  | 3.36602875 |
| N  | 1.77213916 | 9.71862612  | 3.36610866 |
| N  | 5.75646784 | 9.71850600  | 3.36610866 |
| Al | 3.76418840 | 9.71845626  | 3.36610866 |
| Al | 7.75033693 | 9.71833613  | 3.36610866 |
| Al | 1.77195924 | 1.94389943  | 3.36636848 |
| Al | 5.75641757 | 1.94369940  | 3.36636848 |
| N  | 3.76478849 | 1.94365918  | 3.36637854 |
| N  | 7.75007710 | 1.94356922  | 3.36637854 |
| N  | 1.77213916 | 3.88732842  | 3.36644892 |
| N  | 5.75646784 | 3.88720830  | 3.36644892 |
| Al | 3.76418840 | 3.88715856  | 3.36645844 |

|    |            |             |             |
|----|------------|-------------|-------------|
| Al | 7.75033693 | 3.88704849  | 3.36645844  |
| Al | 1.77195924 | 10.69097563 | 5.04921802  |
| Al | 5.75641757 | 10.69077560 | 5.04922807  |
| N  | 7.75007710 | 10.69065601 | 5.04922807  |
| N  | 3.76478849 | 10.69073591 | 5.04922807  |
| N  | 1.77213916 | 0.97119961  | 5.04929792  |
| N  | 5.75646784 | 0.97107948  | 5.04930798  |
| Al | 7.75033693 | 0.97091967  | 5.04930798  |
| Al | 3.76419846 | 0.97102974  | 5.04930798  |
| Al | 1.77195924 | 4.85925829  | 5.04931803  |
| Al | 5.75641757 | 4.85905826  | 5.04931803  |
| N  | 3.76478849 | 4.85901805  | 5.04932809  |
| N  | 7.75007710 | 4.85892809  | 5.04932809  |
| N  | 1.77213916 | 6.80268728  | 5.04939794  |
| N  | 5.75646784 | 6.80256716  | 5.04939794  |
| Al | 3.76419846 | 6.80252747  | 5.04940799  |
| Al | 7.75033693 | 6.80240735  | 5.04940799  |
| C  | 4.72022393 | 5.15813121  | 14.80740930 |
| C  | 5.12029777 | 4.00005264  | 13.89003590 |
| C  | 4.31538466 | 2.72626981  | 14.19118056 |
| H  | 5.35383699 | 6.04370339  | 14.66152801 |
| H  | 4.38998303 | 4.33155899  | 12.77628797 |
| H  | 3.67764884 | 5.46191915  | 14.60968446 |
| H  | 4.77201579 | 4.86619385  | 15.86827180 |
| H  | 6.19228349 | 3.77088953  | 14.01425569 |
| H  | 4.79368569 | 1.85044091  | 13.72839399 |
| H  | 3.27624670 | 2.80390484  | 13.82568772 |
| H  | 4.25697045 | 2.53613994  | 15.27545962 |

**Table S17.** TS of second C-H activation on Ga/AlN through the stepwise SP mechanism.

Total energy: -869.581 Hartree

|    |            |            |            |
|----|------------|------------|------------|
| Al | 1.75692767 | 1.93068017 | 6.72131121 |
| Al | 5.74188975 | 1.92991068 | 6.72335167 |
| N  | 3.75038818 | 1.93080581 | 6.72495409 |
| N  | 7.73680487 | 1.93186357 | 6.72461542 |
| Al | 3.75417628 | 3.86500807 | 6.70700698 |
| Al | 7.72815008 | 3.86531443 | 6.70595587 |
| N  | 1.75794283 | 3.86473807 | 6.69628844 |
| N  | 5.74068004 | 3.86307418 | 6.71087805 |
| Al | 1.76228420 | 7.76131102 | 6.72356739 |
| Al | 5.73899634 | 7.76057496 | 6.72480156 |
| N  | 3.75099335 | 7.76152229 | 6.73154932 |
| N  | 7.73846135 | 7.75971533 | 6.72189133 |
| N  | 1.75879688 | 9.69497521 | 6.70533644 |
| N  | 5.74599879 | 9.69426064 | 6.70585736 |
| Al | 3.75228497 | 9.69344763 | 6.71039628 |

|    |            |             |             |
|----|------------|-------------|-------------|
| Al | 7.73640419 | 9.69338049  | 6.71020802  |
| Al | 1.73951554 | 4.83514439  | 8.34743383  |
| Al | 5.72534859 | 4.84291758  | 8.38697620  |
| N  | 7.70585404 | 4.83107511  | 8.37568904  |
| N  | 3.74489584 | 4.82462043  | 8.38706765  |
| N  | 1.75584389 | 6.76721529  | 8.38214245  |
| N  | 5.71972101 | 6.77260638  | 8.38309660  |
| Al | 7.71988606 | 6.77224109  | 8.37462579  |
| Al | 3.73950273 | 6.76676703  | 8.40770828  |
| Al | 1.74942431 | 10.65561119 | 8.37688834  |
| Al | 5.72995763 | 10.65361882 | 8.38141130  |
| N  | 3.74351970 | 10.64476478 | 8.38915511  |
| N  | 7.72417096 | 10.65214592 | 8.38574128  |
| N  | 1.74635194 | 0.92686240  | 8.37362434  |
| N  | 5.72941131 | 0.93213694  | 8.38094183  |
| Al | 3.73845156 | 0.91507623  | 8.36824692  |
| Al | 7.72170431 | 0.91862131  | 8.36875592  |
| Al | 1.74770118 | 7.73384071  | 10.08777826 |
| Al | 5.70994897 | 7.70923840  | 10.09174427 |
| N  | 3.73447302 | 7.69327501  | 10.13566519 |
| N  | 7.71211406 | 7.74650260  | 10.01293247 |
| N  | 1.74509530 | 9.67149718  | 10.03502382 |
| N  | 5.71664058 | 9.66369140  | 10.04664334 |
| Al | 3.73303767 | 9.64327420  | 10.08448513 |
| Al | 7.71273327 | 9.65731918  | 10.06216129 |
| Al | 1.72708909 | 1.88868902  | 10.06334123 |
| Al | 5.71728186 | 1.88427842  | 10.08567124 |
| N  | 3.72203098 | 1.87476391  | 10.05007488 |
| N  | 7.70817488 | 1.88110158  | 10.04586922 |
| N  | 1.72656877 | 3.81467539  | 9.95816765  |
| N  | 5.69435578 | 3.81954221  | 10.07140970 |
| Al | 3.71838223 | 3.79536455  | 10.01776475 |
| Al | 7.70019051 | 3.81160891  | 10.03538996 |
| Al | 1.72809222 | 10.69527518 | 11.64812934 |
| Al | 5.71858662 | 10.69463500 | 11.65510830 |
| N  | 3.72201458 | 10.58602347 | 11.77481623 |
| N  | 7.71144953 | 10.59590934 | 11.75957883 |
| N  | 1.73013708 | 0.94199116  | 11.75683149 |
| N  | 5.71150653 | 0.93817024  | 11.77082777 |
| Al | 3.71701098 | 0.81191928  | 11.63747881 |
| Al | 7.71052847 | 0.83075600  | 11.64470790 |
| Al | 1.64369292 | 4.95754936  | 11.49673007 |
| Ga | 5.80606821 | 4.84684735  | 11.82122904 |
| N  | 3.53774359 | 4.74704312  | 11.71590466 |
| N  | 7.78761999 | 4.74828686  | 11.70278244 |
| N  | 1.67080426 | 6.82279171  | 11.74203428 |



|    |            |             |             |
|----|------------|-------------|-------------|
| N  | 5.79263254 | 6.78441384  | 11.75670236 |
| Al | 3.71331480 | 6.76993528  | 11.92807120 |
| Al | 7.71511944 | 6.69856618  | 11.61517324 |
| Al | 1.77196000 | 1.94404000  | 0.00000000  |
| Al | 1.77196000 | 7.77596000  | 0.00000000  |
| Al | 3.76419000 | 3.88731000  | 0.00000000  |
| Al | 5.75642000 | 1.94384000  | 0.00000000  |
| Al | 5.75642000 | 7.77576000  | 0.00000000  |
| Al | 7.75033000 | 3.88719000  | 0.00000000  |
| N  | 1.77214000 | 3.88748000  | 0.00000000  |
| N  | 3.76479000 | 1.94380000  | 0.00000000  |
| N  | 3.76479000 | 7.77571000  | 0.00000000  |
| N  | 5.75647000 | 3.88736000  | 0.00000000  |
| N  | 7.75007000 | 1.94371000  | 0.00000000  |
| N  | 7.75007000 | 7.77563000  | 0.00000000  |
| N  | 1.77214000 | 9.71939000  | 0.00031000  |
| N  | 5.75647000 | 9.71927000  | 0.00031000  |
| Al | 3.76419000 | 9.71922000  | 0.00031000  |
| Al | 7.75033000 | 9.71911000  | 0.00031000  |
| Al | 1.77196000 | 4.85983000  | 1.68308000  |
| Al | 5.75642000 | 4.85963000  | 1.68308000  |
| N  | 7.75007000 | 4.85950000  | 1.68309000  |
| N  | 3.76479000 | 4.85959000  | 1.68309000  |
| N  | 1.77214000 | 6.80326000  | 1.68316000  |
| N  | 5.75647000 | 6.80314000  | 1.68316000  |
| Al | 7.75033000 | 6.80298000  | 1.68316000  |
| Al | 3.76420000 | 6.80309000  | 1.68316000  |
| Al | 1.77196000 | 10.69132000 | 1.68318000  |
| Al | 5.75642000 | 10.69112000 | 1.68318000  |
| N  | 3.76479000 | 10.69108000 | 1.68318000  |
| N  | 7.75007000 | 10.69099000 | 1.68318000  |
| N  | 1.77214000 | 0.97154000  | 1.68325000  |
| N  | 5.75647000 | 0.97142000  | 1.68325000  |
| Al | 3.76420000 | 0.97137000  | 1.68326000  |
| Al | 7.75033000 | 0.97126000  | 1.68326000  |
| Al | 1.77196000 | 7.77518000  | 3.36603000  |
| Al | 5.75642000 | 7.77498000  | 3.36603000  |
| N  | 3.76479000 | 7.77494000  | 3.36603000  |
| N  | 7.75007000 | 7.77485000  | 3.36603000  |
| N  | 1.77214000 | 9.71862000  | 3.36611000  |
| N  | 5.75647000 | 9.71850000  | 3.36611000  |
| Al | 3.76419000 | 9.71845000  | 3.36611000  |
| Al | 7.75033000 | 9.71833000  | 3.36611000  |
| Al | 1.77196000 | 1.94390000  | 3.36637000  |
| Al | 5.75642000 | 1.94370000  | 3.36637000  |
| N  | 3.76479000 | 1.94366000  | 3.36638000  |

|    |            |             |             |
|----|------------|-------------|-------------|
| N  | 7.75007000 | 1.94357000  | 3.36638000  |
| N  | 1.77214000 | 3.88733000  | 3.36645000  |
| N  | 5.75647000 | 3.88721000  | 3.36645000  |
| Al | 3.76419000 | 3.88716000  | 3.36646000  |
| Al | 7.75033000 | 3.88705000  | 3.36646000  |
| Al | 1.77196000 | 10.69097000 | 5.04922000  |
| Al | 5.75642000 | 10.69077000 | 5.04923000  |
| N  | 7.75007000 | 10.69065000 | 5.04923000  |
| N  | 3.76479000 | 10.69073000 | 5.04923000  |
| N  | 1.77214000 | 0.97120000  | 5.04930000  |
| N  | 5.75647000 | 0.97108000  | 5.04931000  |
| Al | 7.75033000 | 0.97092000  | 5.04931000  |
| Al | 3.76420000 | 0.97103000  | 5.04931000  |
| Al | 1.77196000 | 4.85926000  | 5.04932000  |
| Al | 5.75642000 | 4.85906000  | 5.04932000  |
| N  | 3.76479000 | 4.85902000  | 5.04933000  |
| N  | 7.75007000 | 4.85893000  | 5.04933000  |
| N  | 1.77214000 | 6.80268000  | 5.04940000  |
| N  | 5.75647000 | 6.80256000  | 5.04940000  |
| Al | 3.76420000 | 6.80252000  | 5.04941000  |
| Al | 7.75033000 | 6.80240000  | 5.04941000  |
| C  | 6.71655623 | 3.88145213  | 14.63688026 |
| C  | 5.32498032 | 4.13414045  | 14.09321613 |
| C  | 4.49965982 | 5.11602113  | 14.63720518 |
| H  | 7.20703317 | 4.81819951  | 14.93347606 |
| H  | 6.65121196 | 3.23276630  | 15.52479100 |
| H  | 7.36497655 | 3.39112463  | 13.90001848 |
| H  | 3.64123762 | 4.19090086  | 12.56635799 |
| H  | 4.82402853 | 3.22170248  | 13.73463172 |
| H  | 3.93508644 | 6.68088710  | 13.60415911 |
| H  | 4.91048770 | 5.86610837  | 15.31295398 |
| H  | 3.41779968 | 5.01205611  | 14.66252186 |

## 6. References

1. E. V. Miu and G. Mpourmpakis, fp\_chem software package  
[https://github.com/mpourmpakis/fp\\_chem](https://github.com/mpourmpakis/fp_chem).
2. J. J. H. B. Sattler, J. Ruiz-Martinez, E. Santillan-Jimenez and B. M. Weckhuysen, *Chem. Rev.*, 2014, **114**, 10613-10653.
3. A. Barducci, M. Bonomi and M. Parrinello, *WIREs Comput. Mol. Sci.*, 2011, **1**, 826-843.
4. Q. Y. Chang, K. Q. Wang, P. Hu, Z. J. Sui, X. G. Zhou, D. Chen, W. K. Yuan and Y. A. Zhu, *AIChE J.*, 2020, **66**, n/a.
5. Q.-Y. Chang, Q. Yin, F. Ma, Y.-A. Zhu, Z.-J. Sui, X.-G. Zhou, D. Chen and W.-K. Yuan, *Ind. Eng. Chem. Res.*, 2019, **58**, 10199-10209.
6. J. Zhang, R.-J. Zhou, Q.-Y. Chang, Z.-J. Sui, X.-G. Zhou, D. Chen and Y.-A. Zhu, *Catal. Today*, 2021, **368**, 46-57.
7. L. Xiao, Z. Xie, S. Song, Z. Zhao, M. Ke, W. Song, Z. Zhao and J. Liu, *Ind. Eng. Chem. Res.*, 2021, **60**, 1200-1209.
8. D. Zhao, H. Lund, U. Rodemerck, D. Linke, G. Jiang and E. V. Kondratenko, *Catal. Sci. Technol.*, 2021, **11**, 1386-1394.
